# Supplementary material
Source: PubMed Central journal article supplement (PMC6213317)
Supplement: blood843763-suppl1.pdf [file blood843763-suppl1.pdf]

## Supplemental information for ‘A cloning and expression system to probe T cell receptor specificity and assess functional avidity to neoantigens.’

### A. Supplemental Methods

### B. Supplemental Tables

**Table S1.** Sequences of variable and constant TCR segments used in plasmid library

- S1A: TRAV and TRBC sequences used in V $\alpha$ -C $\beta$  library plasmids
- S1B: TRBV and TRAC sequences used in V $\beta$ -C $\alpha$  library plasmids

**Table S2.** CDR3 oligonucleotide sequences (CDR3 $\alpha$ , CDR3 $\beta$ ) used to clone TCRs

**Table S3.** Peptide sequences

- S3A: EBNA3A and BRLF1 peptide sequences
- S3B: CEF peptide sequences
- S3C: Melanoma neoantigen peptide sequences
- S3D: CLL neoantigen peptide sequences

**Table S4.** TCR and housekeeping gene primer sequences

- S4A: Sequences of TRAC and TRAV primers used in RT-PCR1
- S4B: Sequences of TRBC and TRBV primers used in RT-PCR1
- S4C: Sequences of housekeeping gene primers used in RT-PCR1
- S4D: TRAV primers used in PCR2
- S4E: TRBV primers used in PCR2
- S4F: TRAC primers used in PCR2
- S4G: TRBC primers used in PCR2
- S4H: Housekeeping gene primers used in PCR2
- S4I: TCR-Row barcode oligos (P5 barcode) used in PCR3
- S4J: TCR-Plate barcode oligos used in PCR3
- S4K: Housekeeping column primers used in PCR3
- S4L: Housekeeping row primers used in PCR3

**Table S5.** TCR sequences from paired TCR $\alpha\beta$  sequencing

- S5A: TCR sequences of CEF-reactive T cells (Donor 1)
- S5B: TCR sequences of CEF-reactive T cells (Donor 2)
- S5C: TCR sequences of non-CEF-reactive T cells (Donor 1 and 2)
- S5D: TCR sequences of melanoma neoantigen pool-reactive CD4<sup>+</sup> T cells (Patient 1)
- S5E: TCR sequences of melanoma neoantigen pool-reactive CD8<sup>+</sup> T cells (Patient 3)
- S5F: TCR sequences of mut-*MGA*-reactive T cells

### C. Supplemental Figures

**Figure S1.** Sequences as figures

- S1A: NFAT-luciferase
- S1B: Variable chain plasmid library constructs (examples used to clone EBNA3A-specific TCR)
- S1C: CDR3 oligonucleotide (example designed to clone EBNA3A-specific TCR)
- S1D: Cloned TCR in pUC57-kanamycin vector (EBNA3A-specific TCR)
- S1E: Cloned TCR in PEW vector (EBNA3A-specific TCR)

**Figure S2.** Characterization of costimulation molecules expressed by the Jurkat $\Delta\alpha\beta$

**Figure S3.** Deconvolution of peptides by IFN $\gamma$  ELISPOT for melanoma Patient 3

**Figure S4.** Identification of immunogenic neoantigens from indel mutations in CLL

## **A. Supplemental Methods**

### **Human PBMC samples, cell lines and cell culture**

Peripheral blood mononuclear cells (PBMCs) were isolated using Ficoll-Hypaque and cryopreserved with 10% dimethylsulfoxide (DMSO) in fetal bovine serum (FBS) until the time of analysis. HEK 293T cells (ATCC, Manassas, VA) were cultured in Dulbecco's Modified Eagle Medium (DMEM, Gibco, Waltham, MA) containing 10% FBS and 1% penicillin-streptomycin (P/S, Gibco). Jurkat $\Delta\alpha\beta$  with stable CD28, CD8 $\alpha\beta$  +/- CD4 expression (Jurkat $\Delta\alpha\beta$ ) and Jurkat $\Delta\alpha\beta$  reporter cells were cultured in 'complete RPMI media': RPMI-1640 media supplemented with L-glutamine (Gibco), 10% FBS and 1% P/S. Mono-allelic B cells generated by transduction of B721.221 cells with a retroviral vector coding a single class I HLA allele were used (cells expressing HLA-A\*24:02 were purchased from the Fred Hutchinson Research Cell Bank, University of Washington; cells expressing HLA-A\*03:01 were a gift from Dr. Marcus Altfeld and Dr. Wilfredo F. Garcia-Beltran, Ragon Institute; others were a gift from Dr. E.L. Reinherz, DFCI). K562 cells expressing HLA-A\*02:01 (K562-A2)<sup>1,2</sup> and B721.221 cells stably expressing HLA-A\*24:02 were cultured in complete RPMI with 400  $\mu\text{g}/\text{ml}$  G418. The B721.221 cell lines stably expressing HLA-B\*27:05<sup>3</sup> and HLA-A\*03:01<sup>4</sup> were cultured in complete RPMI with 0.3  $\mu\text{g}/\text{ml}$  puromycin. PBMCs were cultured in RPMI-1640 supplemented with L-glutamine with 10% human serum AB (Gemini Bioproduct, West Sacramento, CA; heat-inactivated 30 mins, 56°C), 1% P/S, 1% MEM sodium pyruvate, 1% MEM non-essential amino acids (NEAA, Gibco), 10mM HEPES buffer and 50 $\mu\text{M}$  2-mercaptoethanol (Gibco). All cells were cultured at 37°C, 5% CO<sub>2</sub>.

### **HLA typing of healthy donor samples**

PBMC DNA was extracted using DNeasy Blood & Tissue Kit (Qiagen, Hilden, Germany) for HLA class I and class II molecular typing (Tissue Typing Laboratory, Brigham and Women's Hospital, MA). Typing was determined by PCR-rSSO (reverse sequence specific oligonucleotide probe), with

ambiguities resolved by PCR-SSP (sequence specific primer) techniques (One Lambda Inc, Canoga Park, CA).

## **Peptides**

Lyophilized CEF peptides were purchased as a pool from AnaSpec (Fremont, CA). Individual CEF and neoantigen peptides were synthesized from either JPT Peptide Technologies (Berlin, Germany) or RS Synthesis (Louisville, KY) (>80% purity). Sequences of the peptides are provided in Supplemental Table 3.

## **IFN $\gamma$ enzyme-linked immunospot (ELISPOT) assay**

IFN $\gamma$  ELISPOT assays were performed using 96-well MultiScreen Filter Plates (Millipore, Billerica, MA), coated with 2  $\mu$ g/ml anti-human IFN $\gamma$  monoclonal antibody (mAb) in PBS overnight (1-D1K, Mabtech, Nacka Strand, Sweden). Plates were washed with PBS and blocked with complete RPMI for 1h before use.  $5 \times 10^3$  T cells (for Figure 3B) or  $3 \times 10^4$  (for Supplemental Figure 3) were co-cultured with  $1 \times 10^4$  autologous CD4<sup>+</sup> and CD8<sup>+</sup> T cell-depleted PBMC, used as antigen presenting cells (APCs). For assessment of immunogenicity of predicted neoantigens in CLL,  $5 \times 10^4$  T cells were co-cultured with  $2.5 \times 10^4$  K562-A2 cells, used as APCs. APCs were pulsed with peptides (10  $\mu$ g/ml) or peptides were directly added to the ELISPOT wells with APCs and incubated with T cells overnight in complete RPMI at 37°C. Plates were rinsed with PBS containing 0.05% Tween-20 and then 1  $\mu$ g/ml anti-human IFN $\gamma$  mAb (7-B6-1-Biotin, Mabtech) was added, followed by Streptavidin-ALP (Mabtech). After rinsing, SIGMA FAST 5-Bromo-4-chloro-3-indolyl phosphate/Nitro blue tetrazolium (Sigma-Aldrich, St Louis, MO) was used to develop the immunospots, and spots were imaged and enumerated with ELISPOT plate reader (Cellular Technology Ltd, Shaker Heights, OH). Statistical analysis was performed with the square root of spot counts from each peptide condition, compared to negative control DMSO, with a one-sided two-sample t-test and significance level of 0.05.

### **Flow cytometry and IFN $\gamma$ catch assay analyses**

Antibodies used for cell staining included anti-CD4 antibody (BV510, OKT-4, eBioscience, San Diego, CA, Alexa Fluor488, OKT-4, Biolegend, San Diego, CA), anti-CD8 (PE-Cy7, SK1, eBioscience), anti-CD3 (APC-Cy7, HIT3a, and APC, UCHT-1, Biolegend, San Diego, CA), anti-CD69 (Pacific Blue, FN50, Biolegend), anti-V $\beta$ 5.1 (APC, LC4, eBioscience), anti-CD28 (APC, T44, Biolegend), anti-CD27 (PE-Cy5, O323, eBioscience), anti-LFA1 (APC, m24, Biolegend), anti-ICOS (APC, ISA-3, eBioscience), anti-OX40 (APC, Ber-ACT35, Biolegend) and anti-4-1BB (APC, 4B4-1, Biolegend). EBNA3A-specific tetramer was obtained from MBL (Woburn, MA). All flow cytometry analysis was performed with BD FACSCanto II High Throughput Sampler (HTS) instrument.

For *ex vivo* IFN $\gamma$  catch experiments, PBMCs were stimulated with 5  $\mu$ g/ml peptide in complete RPMI at 37°C overnight. For detection of cytokines from pre-stimulated CD8<sup>+</sup> T cells, 2x10<sup>6</sup> T cells were re-stimulated overnight with 1x10<sup>6</sup> T cell-depleted PBMCs pulsed with 5  $\mu$ g/ml peptide in complete RPMI at 37 °C. Subsequently, reactive cells were tagged using the IFN $\gamma$  secretion assay. Following T cell stimulation culture, cells were washed, tagged with IFN $\gamma$  Catch Reagent (Miltenyi, Bergisch Gladbach, Germany), and incubated in 10 ml complete RPMI at 37°C for 45 minutes. PE-conjugated IFN $\gamma$  Detection Reagent was used to stain cells secreting cytokine. Cells were then stained with anti-CD4, CD3, and CD8 antibodies for 20 min at 4°C, followed by staining with 7AAD (BD-Bioscience, Franklin Lakes, NJ). IFN $\gamma$ <sup>+</sup> single cells were then sorted into 384 well PCR plates using the FACSaria II SORP UV instrument (DFCI Flow Cytometry Core).

For characterization of costimulatory marker expression on Jurkat $\Delta\alpha\beta$  reporter cells, Jurkat $\Delta\alpha\beta$  reporter cells transduced with M1-specific TCR (P1.7) and healthy donor PBMC were stained with antibodies either resting or after stimulation with anti-CD3 antibody (functional grade, OKT3, Miltenyi). For activation, 6 well plates were coated with anti-CD3 (5  $\mu$ g/ml) at 4°C overnight, and washed before

adding the cells (reporter cells at  $5 \times 10^5$  cells/ml and PBMCs at  $1.5 \times 10^6$ /ml). After overnight culture, cells were cultured with Human TruStain FcX (Biolegend) for 20 min at  $4^\circ\text{C}$  for 20 min, followed by staining with costimulatory marker antibodies or isotype control antibodies at  $4^\circ\text{C}$  for 20 min, and analyzed by flow cytometry.

### **Paired TCR $\alpha\beta$ chain single-cell sequencing**

Linked TCR $\alpha$ /TCR $\beta$  Illumina libraries from single cells were made using a multi-primer based approach. One-step reverse transcription-PCR reactions were performed using gene specific TCR $\alpha$ /TCR $\beta$  -V region and -C region primers (Supplemental Table 4). The first strand complementary DNA (cDNA) was primed using TRAC and TRBC primers. V region PCR amplification used 41 TRAV-specific, 38 TRBV-specific, TRAC and TRBC primers. Amplicons were generated following a second PCR using nested V and C primers: 39 TRAV-specific, 38 TRBV-specific, TRAC and TRBC primers. The C primers were barcoded, and both the C and V primers were tailed using partial Illumina adapter sequences. Final library amplification using Illumina primers introduced two additional barcodes. The barcoding system served a dual purpose – identifying plates and identifying individual wells within a plate, thus permitting parallel sequencing of multiple plates. Illumina sequencing was performed and sequences were aligned with the IMGT database for TCR $\alpha$  and TCR $\beta$  sequences.

The raw fastq files from sequencing were first demultiplexed by P7, P5 and inline barcodes into each well in the plates; TCR $\alpha$  and TCR $\beta$  were also separated by inline barcodes in this step. Wells with TCR $\alpha$  or TCR $\beta$  read counts less than 10 were removed from further analysis. The reads were then aligned to IMGT TCR reference sequences and a list of clonotypes was assembled in each well (MiXCR-2.1.5).<sup>5</sup> The most abundant productive alpha and beta clonotypes were selected and paired for each well. If the fraction of the most abundant productive TCR $\alpha$  or TCR $\beta$  in a well was less than 20% or 60% respectively, the wells were removed.

For 4 of 5 runs, targeted expression data of 5 housekeeping (HK) genes was available for quality control (*ACTB*, *B2M*, *PPPIA*, *RPS3* and *UBB*), and in these instances, pre-filtering based on the presence of detectable expression of these genes was performed before TCR alignment (86-98% of wells in the run had all housekeeping genes expressed. The raw fastq files of HK genes were first aligned to the HK primers (BLAST-2.2.30+).<sup>6</sup> Cutoffs for positive expression were determined by density distribution of the read count per well, for each HK gene in each run. The wells with absent expression of all 5 HK genes were removed from further analysis.

### **TCR cloning from variable chain plasmid library and TCR expression**

The variable chain plasmid library included two types of vectors, encoding the variable segments of the TCR: 46 variable  $\alpha$  with constant  $\beta$  ( $V\alpha$ -C $\beta$ ) and 52 variable  $\beta$  with constant  $\alpha$  ( $V\beta$ -C $\alpha$ ). All constructs were synthesized in pUC57-Kanamycin backbones (Genscript, Piscataway, NJ, example sequence in Supplemental Figure 1B, complete list of segment sequences in Supplemental Table 1). For each TCR, double-stranded oligonucleotides encoding CDR3 $\alpha$  and CDR3 $\beta$ , flanked by BsaI restriction sites designed to be compatible with the variable chain plasmid library, were custom synthesized on demand (Integrated DNA Technologies [IDT], Coralville, IA) (example sequence in Supplemental Figure 1C, all CDR3 oligonucleotide sequences in Supplemental Table 2). Two library plasmids and a CDR3 oligonucleotide, all digested with BsaI, were assembled using Golden Gate Assembly mix (New England Biolabs [NEB], Ipswich, MA) to produce a single vector encoding both TCR $\alpha$  and TCR $\beta$ , separated by a furin, SGSG, and F2A-peptide sequence. The Golden Gate reaction mix was used to transform competent cells (NEB), that were then plated on kanamycin and grown overnight. Colony PCR was performed to select clones. The PCR product and lentiviral backbone PEW were digested with restriction enzymes AgeI and Sall, and ligated using T4 DNA ligase (NEB). The ligation product was used to transform competent cells that were then plated on ampicillin, and grown overnight. Colony

PCR was performed to select clones to expand overnight, and the TCR plasmid was isolated by Midi prep (Qiagen).

TCRs were expressed in reporter cells by lentiviral transduction as follows. HEK293T cells were plated in 6 well plate in antibiotic-free DMEM (DMEM + 10% FBS), and cultured overnight at 37°C, 5% CO<sub>2</sub>. HEK293T cells were transfected with the TCR vector, psPAX2 (Addgene, Cambridge, MA) and VSV (Addgene) at a ratio of 10:10:1 using Lipofectamine 2000 (Thermo Fisher, Waltham, MA). Media was replaced 16h after transfection. Supernatant was harvested after 72h, filtered using a 0.45 µm syringe filter and concentrated using size-exclusion columns (VIVASPIN20 [30,000MW], Sartorius, Goettingen, Germany) by centrifugation at 4°C for 60 min at 2000 rpm. For transduction, JurkatΔαβ reporter cells were plated with 8 µg/ml polybrene (Santa Cruz Biotech, Dallas, TX) in complete RPMI, and transduced with concentrated virus by spin infection (90 min, 2000 rpm, 37°C). After 16h, media was replaced with complete RPMI. All TCRs were expressed in JurkatΔαβ reporter cells with stable CD8αβ expression, except TCRs from CD4<sup>+</sup> T cells from melanoma study Patient 1, which were expressed in JurkatΔαβ reporter cells with stable CD8αβ and CD4 expression. Expression of the TCR was confirmed after 72h by measuring CD3 expression in transduced reporter cells by flow cytometry

A TCR specific for EBNA3A was cloned and expressed using published sequence information: TRAV8-1, TRAJ23, TRBV5-1, TRBD2, TRBJ2-7, CDR3α (CAGRLVDQGGKLIF) and CDR3β (CASSIGLAGYEQYF).<sup>7</sup> The library components for TRAV8-1 and TRBV5-1 were assembled with oligonucleotide encoding CDR3α and CDR3β (Supplemental Figure 1B-C).

### **TCR activation assays**

Autologous antigen-presenting cells (APCs) (derived from CD4/CD8 depleted PBMCs) and HLA-expressing cell lines were pulsed with candidate peptide (10 µg/ml unless specified otherwise) for 2



hours in complete RPMI.  $5 \times 10^5$  TCR-expressing reporter cells were co-cultured with pulsed APCs ( $5 \times 10^5$  autologous APC or  $2.5 \times 10^5$  HLA-expressing cell line) in 96-well U-bottom plate overnight. The addition of PMA (50 ng/ml) and ionomycin (500 ng/ml) to TCR-expressing reporter cells was used as a positive control. TCR activation was measured by IL-2 ELISA, luciferase activity or CD69-expression. Supernatant was harvested from co-culture and diluted 1:2 (unless otherwise specified) with ELISA Assay Diluent (Biolegend) and IL-2 production was measured using the Human IL-2 ELISA Kit II (BD Bioscience) or ELISA MAX Deluxe Kit (Biolegend) according to manufacturer's instructions.

Luciferase production was measured using the Luciferase Assay System with Reporter Lysis Buffer (Promega, Madison, WI), according to manufacturer's instructions. Co-cultured TCR-expressing reporter cells and K562-A2 cells were washed twice with PBS, then lysed in 20  $\mu$ l/well of 1X Reporter Lysis Buffer, followed by a single freeze-thaw cycle in liquid nitrogen. Within one hour of lysis, Light production (RLU) was measured (three seconds per well) using a Luminoskan Ascent Microplate Luminometer (ThermoFisher Scientific, Waltham, MA).

CD69 expression was measured by staining co-cultured TCR-expressing reporter cells with anti-CD69 antibody for 20 min at 4°C and analyzing by flow cytometry.

To measure functional avidity of antigen-specific TCRs, TCR-expressing reporter cells were co-cultured as described above with APCs pulsed with a range of peptide concentrations from 10 pg/ml to 10  $\mu$ g/ml. IL-2 production was measured by ELISA as described. Comparison of IL-2 secretion between mutant and wildtype forms of the peptide was assessed at each concentration using a two-sample t-test with Welch's correction, with p-values considered significant at the 0.05 level.

### **Accession numbers**

The dbGaP accession numbers for the WES data reported previously and used in this paper are phs000435.v1.p1 and phs000922.v1.p1<sup>8,9</sup>.

## B. Supplemental Tables

Table S1. Sequences of variable and constant TCR segments used in plasmid library

**Table S1A.** TRAV and TRBC sequences used in V $\alpha$ -C $\beta$  library plasmids

The TRBC sequence used to construct our library is 6 bp shorter on the 5' end than the sequence listed in IMGT. All TRAV sequences used to construct our library are approximately 16 bp shorter on the 3' end from those listed in IMGT. The absent regions are included in the CDR3 oligonucleotides. Single nucleotide changes (synonymous changes) were introduced to remove potential cut sites by restriction enzymes (highlighted). Sequences are from IMGT database, accessed in January 2015.

| Segment                    | Leader Sequence                                                                              | Sequence                                                                                                                                                                                                                                                                                                                                                                                                                                                                                                                                                                                                 |
|----------------------------|----------------------------------------------------------------------------------------------|----------------------------------------------------------------------------------------------------------------------------------------------------------------------------------------------------------------------------------------------------------------------------------------------------------------------------------------------------------------------------------------------------------------------------------------------------------------------------------------------------------------------------------------------------------------------------------------------------------|
| Constant beta (C $\beta$ ) | N/A                                                                                          | CTGAACAAGGTGTTCCACCCGAGGTGCGTGTGTTGAGCCATCAGAAGCAGAGATCTC<br>CCACACCCAAAAGGCCACACTGGTGTGCTGGCCACAGGCTTCTCCCGACCACGTGG<br>AGCTGAGCTGGTGGGTGAATGGGAAGGAGGTGCACAGTGGGGTCAGCACGGACCCGCA<br>GCCCCCAAGGAGCAGCCCGCCCTCAATGACTCCAGATACTGCCTGAGCAGCCGCTGA<br>GGGTTCGGCCACCTTCTGGCAGAACCCCGCAACCACTTCCGCTGTCAAGTCCAGTTCT<br>ACGGGCTCTCGGAGAATGACGAGTGGACCCAGGATAGGGCCAAACCCGTCACCCAGATC<br>GTCAGCGCCGAGGCTGGGGTAGAGCAGACTGTGGCTTTACCTCGGTGTCTACCAGCA<br>AGGGGTCCTGTCTGCCACCATCCTCTATGAGATCCTGTAGGGAAGGCCACCCTGTATGC<br>TGTGCTGGTCAGCGCCCTGTGTTGATGGCCATGGTCAAGAGAAAGGATTTCT<br><br>BsaI site (changed from C to T) |
| TRAV1-1                    | ATGTGGGGAGCTTT<br>CCTTCTATGTTTC<br>CATGAAGATGGGAG<br>GCACTGCA                                | GGACAAAGCCTTGAGCAGCCCTCTGAAGTGACAGCTGTGGAAGGAGCCATTGTCCAGAT<br>AAACTGCACGTACCAGACATCTGGGTTTTATGGGCTGTCCCTGGTACCAGCAACATGATG<br>GCGGAGCACCCACATTTCTTTCTTACAATGCTCTGGATGGTTTGGAGGAGACAGGTCGTT<br>TTTCTCATTCCTTAGTCGCTCTGATAGTTATGGTTACCTCCTTCTACAGGAGCTCCAGAT<br>GAAAGACTCTGCCTCTTAC                                                                                                                                                                                                                                                                                                                       |
| TRAV1-2                    | ATGTGGGGAGTTTT<br>CCTTCTTTATGTTTC<br>CATGAAGATGGGAG<br>GCACTACA                              | GGACAAAACATTGACCAGCCACTGAGATGACAGCTACGGAAGGTGCCATTGTCCAGAT<br>CAACTGCACGTACCAGACATCTGGGTTCAACGGGCTGTTCTGGTACCAGCAACATGCTG<br>GCGAAGCACCCACATTTCTGTCTTACAATGTTCTGGATGGTTTGGAGGAGAAAGTCGTT<br>TTTCTCATTCCTTAGTCGCTTAAAGGGTACAGTTACCTCCTTTTGAAGGAGCTCCAGAT<br>GAAAGACTCTGCCTCTTAC                                                                                                                                                                                                                                                                                                                           |
| TRAV2                      | ATGGCTTTCAGAG<br>CACTCTGGGGCGG<br>TGTGGCTAGGGCTT<br>CTCCTCAACTCTCT<br>TGGAAGGTTGCAGA<br>AAGC | AAGGACCAAGTGTTCAGCCTTCCACAGTGGCATCTTCAGAGGGAGCTGTGGTGGAAAT<br>CTTCTGTAATCACTCTGTGTCCAATGCTTACAACCTCTTCTGGTACCTTCACTTCCCGGGA<br>TGTGCACCAAGACTCCTTGTAAAGGCTCAAAGCCTTCTCAGCAGGGACGATACAACAT<br>GACCTATGAACGGTTCCTTCATCGCTGCTCATCTCCAGGTGCGGGAGGCAGATGTCTGC<br>TGTTTAC                                                                                                                                                                                                                                                                                                                                      |
| TRAV3                      | ATGGCCTCTGCACC<br>CATCTCGATGCTTG<br>CGATGCTCTTACA<br>TTGAGTGGGCTGAG<br>A                     | GCTCAGTCAGTGGCTCAGCCGGAAGATCAGGTCAACGTTGCTGAAGGGAATCCTCTGAC<br>TGTGAAATGCACCTATTCAGTCTCTGGAAACCCCTTATCTTTTTTGGTATGTTCAATACCCC<br>AACCGAGGCCTCCAGTTCCCTTCTGAAATACATCACAGGGGATAACCTGGTTAAAGGCAG<br>CTATGGCTTTGAAGCTGAATTTAACAAGAGCCAAACCTCCTTCCACCTGAAGAAACCATC<br>TGCCCTTGTGAGCGACTCCGCTTTGTAC                                                                                                                                                                                                                                                                                                            |
| TRAV4                      | ATGAGGCAAGTGGC<br>GAGAGTGATCGTGT<br>TCCTGACCCTGAGT<br>ACTTTGAGC                              | CTTGCTAAGACCACCCAGCCCATCTCCATGGACTCATATGAAGGACAAGAAGTGAACAT<br>AACCTGTAGCCACAACAACATTGCTACAAATGATTATATCACGTGGTACCAACAGTTTCC<br>CAGCCAAGGACCACGATTTATTATTCAAGGATACAAGACAAAAGTTACAACGAAGTGG<br>CCTCCCTGTTTATCCCTGCCGACAGAAAGTCCAGCACTCTGAGCCTGCCCGGGTTTCCC<br>TGAGCGCACTGCTGTGTAC                                                                                                                                                                                                                                                                                                                          |
| TRAV5                      | ATGAAGACATTGTC<br>TGGATTTTCGTTCT<br>GTTTTGTGGCTGC<br>AGCTGGACTGTATG<br>AGTAGA                | GGAGAGGATGTGGAGCAGAGTCTTTTCTGAGTGTCCGAGAGGGAGACAGCTCCGTTAT<br>AAACTGCACTTACACAGACAGCTCCTCCACCTACTTATACTGGTATAAGCAAGAACCTG<br>GAGCAGGACTCCAGTGTGACGTATATTTTCAAATATGGACATGAAACAAGACCAA<br>AGACTCACTGTTCTATTGAATAAAAAGGATAAACATCTGTCTCTGCGCATTCAGACACC<br>CAGACTGGGACTCAGCTATCTAC<br><br>BsaI site (T to A)                                                                                                                                                                                                                                                                                                 |

|         |                                                                                                          |                                                                                                                                                                                                                                                                                             |
|---------|----------------------------------------------------------------------------------------------------------|---------------------------------------------------------------------------------------------------------------------------------------------------------------------------------------------------------------------------------------------------------------------------------------------|
| TRAV6   | ATGGAGTCATTCT<br>GGGAGGTGTTTTGC<br>TGATTTTGTGGCTTC<br>AAGTGGACTGGGTG<br>AAG                              | AGCCAAAAGATAGAACAGAATTCGAGGCCCTGAACATTCAGGAGGGTAAAACGGCCA<br>CCCTGACCTGCAACTATACAACTATTCCCCAGCATACTTACAGTGGTACCGACAAGATC<br>CAGGAAGAGGCCCTGTTTTCTTGCTACTCATACGTGAAAATGAGAAAAGAAAAAGGAAA<br>GAAAGACTGAAGGTACCTTTTGATACCACCTTAAACAGAGTTTGTTCATATCACAGCC<br>TCCCAGCTGCAGACTCAGTACCTAC          |
| TRAV7   | ATGGAGAAGATGCG<br>GAGCCTGTCTTAA<br>TTATATTTTGTCTAT<br>GTCTTGGCTGGGCA<br>AATGGA<br><br>BsaI site (A to G) | GAAAACCAGGTGGAGCACAGCCCTCATTTTCTGGGACCCAGCAGGGAGACGTTGCCTC<br>CATGAGCTGCACGTACTCTGTCAGTCGTTTTAACAATTTGCAGTGGTACAGGCAAAATAC<br>AGGGATGGGTCCCAAACACCTATTATCCATGTATTACAGTGGATATGAGAAGCAGAAAAG<br>GAAAGACTAAATGCTACATTACTGAAGAATGGAAGCAGCTTGACATTACAGCCGTGCAG<br>CCTGAAGATTCAGCCACCTAT          |
| TRAV8-1 | ATGCTCCTGTTGCTC<br>ATACCAGTGTGGG<br>GATGATTTTGGCCT<br>GAGAGATGCCAGA                                      | GCCCAGTCTGTGAGCCAGCATAACCACCACGTAATTCTCTCTGAAGCAGCCCTACTGGA<br>GTTGGGATGCAACTATTCCATGTTGGAACGTAAATCTCTTCTGGTATGTCCAGTACCC<br>TGGTCAACACCTTCAGCTTCTCTCAAGTACTTTTCAGGGGATCCACTGGTTAAAGGCAT<br>CAAGGGCTTTGAGGCTGAATTTATAAAGAGTAAATCTCTCTTAAATCTGAGGAAACCCCT<br>TGTGCAGTGGAGTGACACAGCTGAGTAC    |
| TRAV8-2 | ATGCTCCTGCTGCT<br>CGTCCCAGTGTCTG<br>AGGTGATTTTFACT<br>CTGGGAGGAACCA<br>A                                 | GCCCAGTCGGTGACCCAGCTTGACAGCCACGTCTCTGTCTCTGAAGGAACCCCGGTGCTG<br>CTGAGGTGCAACTACTCATCTTTATTACCATCTCTCTCTGGTATGTGCAACACCCCA<br>ACAAAGGACTCCAGCTTCTCTGAAGTACACATCAGCGGCCACCTGGTTAAAGGCATC<br>AACGGTTTTGAGGCTGAATTTAAGAAGAGTAAAACCTCCTCCACCTGACGAAACCCCT<br>AGCCCATATGAGCGACGCGGCTGAGTAC        |
| TRAV8-3 | ATGCTCCTGGAGCT<br>TATCCACTGTCTGG<br>GGATACATTTTGT<br>CTGAGAAGTCCAG<br>A                                  | GCCCAGTCAGTGACCCAGCCTGACATCCACATCACTGTCTCTGAAGGAGCCCTACTGGA<br>GTTGAGATGTAACATTTCTATGGGGCAACACCTTATCTCTTCTGGTATGTCCAGTCCCC<br>CGGCCAAGGCCCTCCAGCTGCTCTGAAGTACTTTTCAGGAGACACTCTGGTTCAAGGCAT<br>TAAAGGCTTTGAGGCTGAATTTAAGAAGAGTCAAATCTCTCTCAATCTGAGGAAACCCCT<br>TGTGCATTGGAGTGATGTCTGCTGAGTAC |
| TRAV8-4 | ATGCTCCTGCTGCT<br>CGTCCCAGTGTCTG<br>AGGTGATTTTACC<br>CTGGGAGGAACCA<br>A                                  | GCCCAGTCGGTGACCCAGCTTGGCAGCCACGTCTCTGTCTCTGAAGGAGCCCTGGTTCTG<br>CTGAGGTGCAACTACTCATCGTCTGTTCACCATATCTCTTCTGGTATGTGCAATACCC<br>AACCAAGGACTCCAGCTTCTCTGAAGTACACATCAGCGGCCACCTGGTTAAAGGCAT<br>CAACGGTTTTGAGGCTGAATTTAAGAAGAGTAAAACCTCCTCCACCTGACGAAACCCCT<br>CAGCCCATATGAGCGACGCGGCTGAGTAC     |
| TRAV8-6 | ATGCTCCTGCTGCT<br>CGTCCCAGCGTTCC<br>AGGTGATTTTACC<br>CTGGGAGGAACCA<br>A                                  | GCCCAGTCTGTGACCCAGCTTGACAGCCAAGTCCCTGTCTTTGAAGAAGCCCTGTGGAG<br>CTGAGGTGCAACTACTCATCGTCTGTTTCAGTGTATCTCTTCTGGTATGTGCAATACCCCA<br>ACCAAGGACTCCAGCTTCTCTGAAGTATTATCAGGATCCACCTGGTTGAAAGCATCA<br>ACGGTTTTGAGGCTGAATTTAACAAGAGTCAAACCTCTCTCCACTTGAGGAAACCCCTCAG<br>TCCATATAAGCGACACGGCTGAGTAC    |
| TRAV8-7 | ATGCTCTTAGTGGT<br>CATTCTGCTGCTTG<br>GAATGTTCTTACA<br>CTGAGAACCAGA                                        | ACCCAGTCGGTGACCCAGCTTGATGGCCACATCACTGTCTCTGAAGAAGCCCTCTGGA<br>ACTGAAGTGCACACTATTCCATAGTGGAGTTCCTTCTCTCTTCTGGTATGTCCAATACTCT<br>AGCCAAAGCCTCCAGCTTCTCTCAAAGACCTAACAGAGGCCACCCAGGTTAAAGGCAT<br>CAGAGGTTTTGAGGCTGAATTTAAGAAGAGCGAAACCTCTTCTACTGAGGAAACCAT<br>CAACCCATGTGAGTGATGTCTGCTGAGTAC    |
| TRAV9-1 | ATGAATCTTCTCC<br>AGGACCAGCGATTG<br>CACTATTCTTAATGT<br>TTGGGGGAATCAAT                                     | GGAGATTCAGTGGTCCAGACAGAAGGCCAAGTGCTCCCTCTGAAGGGGATTCCCTGAT<br>TGTGAAGTGTCTCTATGAAACCACACAGTACCCTTCCCTTTTTTGGTATGTCCAATATCCT<br>GGAGAAGGTCCACAGCTCCACCTGAAAGCCATGAAGGCCAATGACAAGGGAAGGAACA<br>AAGGTTTTGAAGCCATGTACCGTAAAGAAACCCTTCTTCCACTTGAGAAAAGACTCA<br>GTTCAAGAGTCAGACTCCGCTGTGTAC       |
| TRAV9-2 | ATGAACTATTCTCC<br>AGGCTTAGTATCTC<br>TGATACTTACTG<br>CTTGGAAAGAACCCG<br>T                                 | GGAAATTCAGTGACCCAGATGGAAGGGCCAGTGACTCTCTCAGAAGAGGCCCTCTGAC<br>TATAAACTGCACGTACACAGCCACAGGATACCCTTCCCTTTTCTGGTATGTCCAATATCC<br>TGGAGAAGGTCTACAGTCTCTCTGAAAGCCACGAAGGCTGATGACAAGGGAAGCAAC<br>AAAGGTTTTGAAGCCATACCGTAAAGAAACCCTTCTTCCACTTGAGAAAAGGCTC<br>AGTTCAAGTGTGAGACTCAGCGGTGTAC          |
| TRAV10  | ATGAAAAAGCATCT<br>GACGACCTTCTTGG<br>TGATTTTGTGGCTTT                                                      | AAAAACCAAGTGGAGCAGAGTCCCTCAGTCCCTGATCATCTGGAGGGAAGAACTGCAC<br>TCTTCAATGCAATTATACAGTGAGCCCTTTCAGCAACTTAAAGGTGGTATAAGCAAGATAC<br>TGGGAGAGGTCTGTTCCCTGACAATCATGACTTTCAGTGAGAACACAAAGTCGAACG                                                                                                    |

|            |                                                                                    |                                                                                                                                                                                                                                                                                                                    |
|------------|------------------------------------------------------------------------------------|--------------------------------------------------------------------------------------------------------------------------------------------------------------------------------------------------------------------------------------------------------------------------------------------------------------------|
|            | ATTTTTATAGGGGG<br>AATGGC                                                           | GAAGATATACAGCAACTCTGGATGCAGACACAAAGCAAAGCTCTCTGCACATCACAGCC<br>TCCCAGCTCAGCGATTACAGCCTCCTAC                                                                                                                                                                                                                        |
| TRAV12-1   | ATGATATCCTTGAG<br>AGTTTTACTGGTGA<br>TCCTGTGGCTTCAG<br>TTAAGCTGGGTTTG<br>GAGCCAA    | CGGAAGGAGGTGGAGCAGGATCCTGGACCTTCAATGTTCAGAGGGAGCCACTGTCCG<br>TTTCAACTGTACTTACAGCAACAGTGCTTCTCAGTCTTCTTCTGGTACAGACAGGATTG<br>CAGGAAAAGAACCTAAGTTGCTGATGTCCGTATACTCCAGTGGTAATGAAGATGGAAGGT<br>TTACAGCACAGCTCAATAGAGCCAGCCAGTATATTTCCCTGCTCATCAGAGACTCCAAG<br>TCAGTGATTACGCCACTAC                                     |
| TRAV12-2   | ATGAAATCCTTGAG<br>AGTTTTACTAGTGA<br>TCCTGTGGCTTCAG<br>TTGAGCTGGGTTTG<br>GAGCCAA    | CAGAAGGAGGTGGAGCAGAATTCTGGACCCCTCAGTGTTCAGAGGGAGCCATTGCCTC<br>TCTCAACTGCACTTACAGTGACCGAGGTTCCAGTCTTCTTCTGGTACAGACAATATTC<br>TGGGAAAAGCCCTGAGTTGATAATGTTCATATACTCCAATGGTGACAAAAGAAGATGGAA<br>GGTTTACAGCACAGCTCAATAAAGCCAGCCAGTATGTTTCTGCTCATCAGAGACTCCC<br>AGCCCAGTGATTACGCCACTAC                                   |
| TRAV12-3   | ATGATGAAATCCTT<br>GAGAGTTTTACTGG<br>TGATCCTGTGGCTT<br>CAGTTAAGCTGGGT<br>TTGGAGCCAA | CAGAAGGAGGTGGAGCAGGATCCTGGACCACTCAGTGTTCAGAGGGAGCCATTGTTTC<br>TCTCAACTGCACTTACAGCAACAGTGCTTTTCAATACTTTCATGTGGTACAGACAGTATTC<br>CAGAAAAGGCCCTGAGTTGCTGATGTACACATACTCCAGTGGTAACAAAAGAAGATGGAA<br>GGTTTACAGCACAGGTCGATAAATCCAGCAAGTATATCTCCTTGTTCATCAGAGACTCAC<br>AGCCCAGTGATTACGCCACTAC                              |
| TRAV13-1   | ATGACATCCATTCTG<br>AGCTGTATTTATATT<br>CCTGTGGCTGCAGC<br>TGGACTTGGTGAAT             | GGAGAGAATGTGGAGCAGCATCCTTCAACCCTGAGTGTCCAGGAGGGAGACAGCGCTGT<br>TATCAAGTGTACTTATTCAGACAGTGCCCTCAAACCTACTTCCCTTGGTATAAGCAAGAATC<br>TGGAAAAGGACCTCAGCTTATTATAGACATTCTGTTCAAATATGGACAAAAGAAAGACC<br>AACGAATTGCTGTACATTGAACAAGACAGCCAAACATTTCTCCCTGCACATCACAGAG<br>ACCAACCTGAAGACTCGGCTGTCTAC<br><br>BsaI site (C to A) |
| TRAV13-2   | ATGGCAGGCATTCTG<br>AGCTTTATTTATGTA<br>CCTGTGGCTGCAGC<br>TGGACTGGGTGAGC<br>AGA      | GGAGAGAGTGTGGGGTGCATCTTCCCTACCCTGAGTGTCCAGGAGGGTGACAACCTCTAT<br>TATCAACTGTGCTTATTCAAAACAGCGCCTCAGACTACTTCAATTTGGTACAAGCAAGAATC<br>TGGAAAAGGACCTCAATTCATTATAGACATTCTGTTCAAATATGGACAAAAGAAAGACC<br>AAAAGAGTCACCGTTTTATGAATAAGACAGTGAAACATCTCTCTCTGCAAATTGCAGCTA<br>CTCAACCTGGAGACTCAGCTGTCTAC                        |
| TRAV14/DV4 | ATGTCACTTTCTAG<br>CCTGCTGAAGGTGG<br>TCACAGCTTCACTG<br>TGGCTAGGACCTGG<br>CATT       | GCCGAGAAGATAACTCAAACCCAAACCAGGAATGTTTCGTGCAGGAAAAGGAGGCTGTGA<br>CTCTGGACTGCACATATGACACCAGTGATCCAAGTTATGGTCTATTCTGGTACAAGCAGC<br>CCAGCAGTGGGGAAATGATTTTTCTTATTATCAGGGGTCTTATGACCAGCAAAAATGCAA<br>CAGAAGGTGCTACTCATTGAATTTCCAGAAGGCAAGAAAATCCGCCAACCTTGTCTATC<br>TCCGCTTCAAACTGGGGGACTCAGCAATGTAC                    |
| TRAV16     | ATGAAGCCACCCT<br>CATCTCAGTGCTTG<br>TGATAATATTTATA<br>CTCAGAGGAACAAG<br>A           | GCCAGAGAGTGACTCAGCCGAGAAGCTCCTCTCTGTCTTTAAAGGGGCCCCAGTGGA<br>GCTGAAGTGCAACTATTCCCTATTCTGGGAGTCTGAACCTTCTGGTATGTCCAGTACTC<br>CAGACAACGCCTCCAGTACTCTTGAGACACATCTCTAGAGAGAGCATCAAAGGCTTCA<br>CTGCTGACCTTAACAAAGGCGAGACATCTTCCACCTGAAGAAACCATTGTCAAGAG<br>GAAGACTCAGCCATGTAT                                           |
| TRAV17     | ATGGAAACTCTCCT<br>GGGAGTGTCTTTGG<br>TGATTCTATGGCTTC<br>AACTGGCTAGGGTG<br>AAC       | AGTCAACAGGGAGAAGAGGATCCTCAGGCCTTGAGCATCCAGGAGGGTGAAAATGCCA<br>CCATGAAGTGCAGTTACAAAAGTATATAACAATTTACAGTGGTATAGACAAAATTC<br>GGTAGAGGCCTGTCCACCTAATTTTAAATACGTTCAAATGAAAAGAGAGAAAACACAGTGG<br>AAGATTAAGAGTCACGCTTGACACTTCCAAGAAAAGCAGTTCTTGTGATCACGGCTTC<br>CCGGCAGCAGACACTGCTTCTTAC                                  |
| TRAV18     | ATGCTGTCTGCTTCC<br>TGCTCAGGACTTGT<br>GATCTTGTGATATT<br>CAGAAGGACCAGT               | GGAGACTCGGTTACCCAGACAGAAGGCCAGTTACCCTCCCTGAGAGGGCAGCTCTGAC<br>ATTAAGTGCCTTATCAGTCCAGTATTCAAACCTTTCTATTCTGGTATGTCCAGTACTTA<br>AACAAAGAGCCTGAGCTCCTCTGAAAAGTTCAGAAAACCAGGAGACGGACAGCAGAG<br>GTTTTAGGCCAGTCTTATCAAGAGTGACAGTTCTTCCACCTGGAGAAGCCCTCGGTGC<br>AGCTGTGGACTCTGCCGTGTAC                                     |
| TRAV19     | ATGCTGACTGCCAG<br>CCTGTTGAGGGCAG<br>TCATAGCCTCCATC<br>TGTGTTGATCCAG<br>CATG        | GCTCAGAAGGTAACCTAAGCGCAGACTGAAATTTCTGTGGTGGAGAAGGAGGATGTGAC<br>CTTGGACTGTGTGATGAAACCCGTGATACTACTTATTACTTATTCTGGTACAAGCAACC<br>ACCAAGTGGAGAATTGGTTTTCTTATTCTGTCGGAACCTTTTGTATGAGCAAAAATGAAAT<br>AAGTGGTCCGTTATTCTTGGAACTTCCAGAAAATCCACCAGTTCTTCAACTTACCATCAC<br>AGCCTCACAAGTCGTGGACTCAGCAGTATAC                     |
| TRAV20     | ATGGAGAAAATGTT<br>GGAGTGTGCATTCA                                                   | GAAGACCAGGTGACGCAGAGTCCCCAGGCCCTGAGACTCCAGGAGGGAGAGAGTAGCA<br>GTCTTAACTGCAGTTACACAGTCAGCGTTAAGAGGGCTGTTCTGGTATAGGCAAGATC                                                                                                                                                                                           |

|            |                                                                                                         |                                                                                                                                                                                                                                                                                                                  |
|------------|---------------------------------------------------------------------------------------------------------|------------------------------------------------------------------------------------------------------------------------------------------------------------------------------------------------------------------------------------------------------------------------------------------------------------------|
|            | TAGTCTTGTGGCTTC<br>AGCTTGGCTGGTTG<br>AGTGGGA                                                            | CTGGGAAAGGCCCTGAATTCCTCTTCACCTGTATTTCAGCTGGGGAAGAAAAGGAGAAA<br>GAAAGGCTAAAAGCCACATTAACAAAGAAGGAAAAGCTTTCGACATCACAGCCCCTAA<br>ACCTGAAGACTCAGCCACTTAT                                                                                                                                                              |
| TRAV21     | ATGGAGACACTCTT<br>GGGCTGCTTATCC<br>TTTGGCTGCAGCTG<br>CAATGGGTGAGCAG<br>C<br><br>BsaI site (C to A)      | AAAACAGGAGGTGACGCAGATTCTGCAGCTCTGAGTGTCCAGAAGGAGAAAACTTGGT<br>TCTCAACTGCAGTTTACTGATAGCGCTATTTACAACCTCCAGTGGTTTAGGCAGGACCC<br>TGGGAAAAGGACTCACATCTCTGTTGCTTATTCAGTCAAGTCAGAGAGAGCAAACAAGTG<br>GAAGACTTAATGCCTCGCTGGATAAATCATCAGGACGTAGTACTTTATACATTGCAGCTT<br>CTCAGCTGGTGACTCAGCCACCTAC<br><br>BsaI site (T to A) |
| TRAV22     | ATGAAGAGGATATT<br>GGGAGCTCTGCTGG<br>GGCTCTTGCAGTGC<br>CAGGTTTGTGTGT<br>GAGA                             | GGAATACAAGTGGAGCAGAGTCCTCCAGACTGATTCTCCAGGAGGGAGCCAATTCCAC<br>GCTGCGGTGCAATTTTTCTGACTCTGTGAACAATTTGCAGTGGTTTCATCAAACCCCTTG<br>GGGACAGCTCATCAACCTGTTTACATTCCCTCAGGGACAAAACAGAATGGAAGATTAA<br>GCGCCACGACTGTGCTACGGAACGCTACAGCTTATTGTACATTTCTCTTCCAGACCA<br>CAGACTCAGGCGTTTAT                                       |
| TRAV23/DV6 | ATGGACAAGATCTT<br>AGGAGCATCATTTT<br>TAGTCTGTGGCTTC<br>AACTATGCTGGGTG<br>AGTGGCCAACAGAA<br>GGAGAAAAGTGAC | CAGCAGCAGGTGAAACAAAGTCCTCAATCTTTGATAGTCCAGAAAGGAGGGATTTCAT<br>TATAAACTGTGCTTATGAGAACACTGCGTTGACTACTTCCATGGTACCAACAATTCCC<br>TGGGAAAAGGCCCTGCATTATTGATAGCCATACGTCCAGATGTGAGTGA AAAAGAAAGAAG<br>GAAGATTCACAATCTCCTTCAATAAAAAGTGCCAAGCAGTTCTCATTGCATATCATGGATT<br>CCCAGCTGGAGACTCAGCCACCTAC                         |
| TRAV24     | ATGGAGAAGAATCC<br>TTTGGCAGCCCAT<br>TACTAATCCTCTGG<br>TTTCATCTTGCAGTGC<br>GTGAGCAGC                      | ATACTGAACGTGGAACAAAGTCCTCAGTCACTGCATGTTCCAGGAGGGAGACAGCACCAA<br>TTTACCTGCAGTTCCTTCCAGCAATTTTTATGCCTTACACTGGTACAGATGGGAAAC<br>TGCAAAAAGCCCGAGGCCTGTTTGTAAATGACTTTAAATGGGGATGAAAAGAAGAAAG<br>GACGAATAAGTGCCACTCTTAATACCAAGGAGGGTTACAGCTATTGTACATCAAAGGA<br>TCCCAGCTGAAGACTCAGCCACATA                               |
| TRAV25     | ATGCTACTCATCAC<br>ATCAATGTTGGTCT<br>TATGGATGCAATTG<br>TCACAGGTGAAT                                      | GGACAACAGGTAATGCAAATTCCTCAGTACCAGCATGTACAAGAAGGAGAGGACTTCAC<br>CACGTACTGCAATTCCTCAACTACTTTAAGCAATATACAGTGGTATAAGCAAAGGCCTG<br>GTGGACATCCCGTTTTTTGATACAGTTAGTGAAGAGTGGAGAAGTGAAGAAGCAGAAA<br>AGACTGACATTTCAAGTTGGAGAAAGCAAAAAGAAGCAGCTCCCTGCACATCACAGCCAC<br>CCAGACTACAGATGTAGGAACCTAC                            |
| TRAV26-1   | ATGAGGCTGGTGGC<br>AAGAGTAACTGTGT<br>TTCTGACCTTGGGA<br>ACTATAATT                                         | GATGCTAAGACCACCCAGCCCCCTCCATGGATTGCGCTGAAGGAAGAGCTGCAAACCT<br>GCCTTGTAATCACTCTACCATCAGTGGAAATGAGTATGTGTATTGGTATCGACAGATTCA<br>CTCCCAGGGGCCACAGTATATCATTCATGGTCTAAAAACAATGAAACCAATGAAATGG<br>CCTCTCTGATCATCACAGAAGACAGAAAAGTCCAGCACCTTGATCTGCCCCACGCTACGC<br>TGAGAGACACTGCTGTGTAC                                 |
| TRAV26-2   | ATGAAGTTGGTGAC<br>AAGCATTACTGTAC<br>TCCTATCTTTGGGTA<br>TTATGGGT                                         | GATGCTAAGACCACACAGCCAAATTCATGGAGAGTAACGAAGAAGAGCCTGTTCACTT<br>GCCTTGTAACCACTCCACAAATCAGTGGAACTGATTACATACATTGGTATCGACAGCTTCC<br>CTCCCAGGGTCCAGAGTACGTGATTTCATGGTCTTACAAGCAATGTGAACAACAGAATGG<br>CCTCTCTGGCAATCGTGAAGACAGAAAAGTCCAGTACCTTGATCTGCACCCTGCTACCT<br>TGAGAGATGCTGTGTAC                                  |
| TRAV27     | ATGGTCCTGAAATT<br>CTCCGTGTCATTCT<br>TTGGATTCAGTTGG<br>CATGGGTGAGC                                       | ACCCAGCTGTGGAGCAGAGCCCTCAGTTTCTAAGCATCCAAGAGGGAGAAAATCTCAC<br>TGTGTACTGCAACTCCTCAAGTGTTTTTTCCAGCTTACAATGGTACAGACAGGAGCCTGG<br>GGAAGGTCTGTCTCCTGGTGACAGTAGTTACGGGTGGAGAAGTGAAGAAGCTGAAGA<br>GACTAACCTTTCAGTTTGGTGATGCAAGAAAGGACAGTTCTCTCCACATCACTGCAGCCC<br>AGCCTGGTGATACAGGCCTCTAC                               |
| TRAV29/DV5 | ATGGCCATGCTCCT<br>GGGGGCATCAGTGC<br>TGATTCTGTGGCTTC<br>AGCCAGACTGGGTA<br>AACAGTCAACAGAA<br>GAATGAT      | GACCAGCAAGTTAAGCAAAATTCACCATCCCTGAGCGTCCAGGAAGGAAGAATTTCTAT<br>TCTGAACGTGTACTATACTAACAGCATGTTTGATTATTTCCTATGGTACAAAAAATACCC<br>TGCTGAAGGTCTACATTCCTGATATCTATAAGTTCCATTAAGGATAAAAAATGAAGATGG<br>AAGATTCAGTCTTCTTAAACAAAAGTGCCAAGCACCTCTCTCTGCACATTGTGCCCTC<br>CCAGCCTGGAGACTCTGCAGTGTAC                           |
| TRAV30     | ATGGAGACTCTCCT<br>GAAAGTGCTTTCAG<br>GCACCTTGTGTGG<br>CAGTTGACCTGGGT<br>GAGAAGC                          | CAACAACCAGTGCAGAGTCTCAAGCCGTGATCTCCGAGAAGGGGAAGATGCTGTGCAT<br>CAACTGCAGTTCCTCCAAGGCTTATATCTGTACTGTTACAGGCAGAAAGCATGGTGA<br>AGCACCCTCTTCTGTATGATATTACTGAAGGGTGGAGAACAGAAGGGTGCATGAAAAA<br>TATCTGCTTCAATTAATGAAAAAAGCAGCAAAGCTCCCTGTACCTTACGGCCTCCCAGC<br>TCAGTTACTCAGGAACCTAC                                     |

|              |                                                                                                        |                                                                                                                                                                                                                                                                                               |
|--------------|--------------------------------------------------------------------------------------------------------|-----------------------------------------------------------------------------------------------------------------------------------------------------------------------------------------------------------------------------------------------------------------------------------------------|
| TRAV34       | ATGGAGACTGTCT<br>GCAAGTACTCCTAG<br>GGATATTGGGGTTC<br>CAAGCAGCCTGGGT<br>CAGT                            | AGCCAAGAAGTGGAGCAGAGTCCTCAGTCCTTGATCGTCCAAGAGGGAAAGAATCTCAC<br>CATAAACTGCACGTCATCAAAGACGTTATATGGCTTATACTGGTATAAGCAAAAAGTATG<br>GTGAAGGTCTTATCTTCTTGATGATGCTACAGAAAAGGTGGGGAAGAGAAAAGTCATGAA<br>AAGATAACTGCCAAGTTGGATGAGAAAAAGCAGCAAAGTCCCTGCATATCACAGCCTC<br>CCAGCCCAGCCATGCAGGCATCTAC        |
| TRAV35       | ATGCTCCTGAACA<br>TTTATTAATAATCTT<br>GTGGATGCAGCTGA<br>CATGGGTCAGT                                      | GGTCAACAGCTGAATCAGAGTCCTCAATCTATGTTTATCCAGGAAGGAGAAGATGTCTC<br>CATGAAGTGCACCTTCTCAAGCATATTTAACACCTGGCTATGGTACAAGCAGGAACCTGG<br>GGAAGGTCTGTCTCTTGATAGCCTTATATAAGGCTGGTGAATTGACCTCAAATGGAAG<br>ACTGACTGCTCAGTTTGGTATAACCAGAAAAGGACAGCTTCTGAAATATCTCAGCATCCAT<br>ACCTAGTGATGTAGGCATCTAC          |
| TRAV36/DV7   | ATGATGAAGTGTCC<br>ACAGGCTTACTAG<br>CTATCTTTTGGCTTC<br>TACTGAGCTGGGTG<br>AGCAGT                         | GAAGACAAGGTGGTACAAAGCCCTCTATCTCTGGTTGTCCACGAGGGAGACACCGTAAC<br>TCTCAATTGCAGTTATGAAGTGACTAACTTTCGAAGCCTACTATGGTACAAGCAGGAAA<br>AGAAAAGTCCCACATTTCTATTTATGCTAACTTCAAGTGGAAATTGAAAAGAAGTCAGGA<br>AGACTAAGTAGCATATTAGATAAGAAAAGAACTTCCAGCATCTGAACATCACAGCCAC<br>CCAGACCGGAGACTCGGCCATCTAC         |
| TRAV38-1     | ATGACACGAGTTAG<br>CTTGCTGTGGGCAG<br>TCGTGGTCTCCACC<br>TGTCTTGAATCCGG<br>CATG<br><br>BsaI site (C to G) | GCCCAGACAGTCACTCAGTCTCAACCAGAGATGTCTGTGCAGGAGGCAGAGACTGTGAC<br>CCTGAGTTGCACATATGACACCAGTGAGAATAATTATTATTTGTTCTGGTACAAGCAGCC<br>TCCCAGCAGGCAGATGATTCTCGTTATTTCGCAAGAAGCTTATAAGCAACAGAATGCAA<br>CGGAGAATCGTTTCTGTGAACTTCCAGAAAAGCAGCCAAATCCTTCAGTCTCAAGATCT<br>CAGACTCACAGCTGGGGGACACTGCGATGTAT |
| TRAV38-2/DV8 | ATGGCATGCCCTGG<br>CTTCCTGTGGGCAC<br>TTGTGATCTCCACT<br>GTCTTGAATTTAGC<br>ATG<br><br>BsaI site (C to A)  | GCTCAGACAGTCACTCAGTCTCAACCAGAGATGTCTGTGCAGGAGGCAGAGACAGTGAC<br>CCTGAGCTGCACATATGACACCAGTGAGAGTGATTATTATTCTGGTACAAGCAGCC<br>TCCCAGCAGGCAGATGATTCTCGTTATTTCGCAAGAAGCTTATAAGCAACAGAATGCAA<br>CAGAGAATCGTTTCTGTGAACTTCCAGAAAAGCAGCCAAATCCTTCAGTCTCAAGATCT<br>CAGACTCACAGCTGGGGGATGCCGCGATGTAT     |
| TRAV39       | ATGAAGAAGCTACT<br>AGCAATGATTCTGT<br>GGCTTCAACTAGAC<br>CGCTTAAAGTGGA<br><br>AgeI site (G to C)          | GAGCTGAAAGTGGAACAAAACCCCTCTGTTCTGAGCATGCAGGAGGGAAAAAACTATAC<br>CATCTACTGCAATTATCAACCACCTCAGACAGACTGTATTGGTACAGGCAGGATCCTGG<br>GAAAAGTCTGGAATCTCTGTTTGTGTTGCTATCAAATGGAGCAGTGAAGCAGGAGGGAC<br>GATTAATGGCCTCACTTGATACCAAAGCCCTCAGCACCCCTCCACATCACAGCTGCCG<br>TGCATGACCTCTCTGCCACCTAC            |
| TRAV40       | ATGAACTCCTCTCT<br>GGACTTTCTAATTCT<br>GATCTTAATGTTTG<br>GAGGAACCAGC                                     | AGCAATTCAGTCAAGCAGACGGGCCAAATAACCGTCTCGGAGGGAGCATCTGTGACTAT<br>GAACTGCACATACATCCACGGGGTACCCTACCCTTTTCTGGTATGTGGAATACCCCAG<br>CAAACCTCTGCAGCTTCTTCAGAGAGAGACAATGGAAAACAGCAAAAACCTTCGGAGGCG<br>GAAATATTAAGACAAAACCTCCCCATTGTGAAATATTCAGTCCAGGTATCAGACTCA<br>GCCGTGTAC                           |
| TRAV41       | ATGGTGAAGATCCG<br>GCAATTTTGTGG<br>CTATTTTGTGGCTTC<br>AGCTAAGCTGTGTA<br>AGTGCCGCC                       | AAAAATGAAGTGGAGCAGAGTCCTCAGAACCTGACTGCCAGGAAGGAGAATTTATCAC<br>AATCAACTGCAGTACTCGGTAGGAATAAGTGCCTTACACTGGCTGCAACAGCATCCAG<br>GAGGAGGCATTGTTTCTGTTTATGCTGAGCTCAGGGAAGAAAGCATGGAAGATTA<br>ATTGCCACAATAAACATACAGGAAAAGCACAGCTCCCTGCACATCACAGCCTCCCATCC<br>CAGAGACTCTGCCGTCTAC                     |

**Table S1B.** TRBV and TRAC sequences used in V $\beta$ -C $\alpha$  library plasmids

The TRAC sequence used to construct our library is 14 bp shorter on the 5' end than the sequence listed in IMGT. All TRBV sequences used to construct our library are approximately 20 bp shorter on the 3' end from those listed in IMGT. The absent regions are included in the CDR3 oligonucleotides. Single nucleotide changes (synonymous changes) were introduced to remove potential cut sites by restriction enzymes (highlighted). Sequences are from IMGT database, accessed in January 2015.

| Segment                      | Leader Sequence                                                                   | Sequence                                                                                                                                                                                                                                                                                                                                                                                                                                        |
|------------------------------|-----------------------------------------------------------------------------------|-------------------------------------------------------------------------------------------------------------------------------------------------------------------------------------------------------------------------------------------------------------------------------------------------------------------------------------------------------------------------------------------------------------------------------------------------|
| Constant alpha (C $\alpha$ ) | N/A                                                                               | TGACCCTGCCGTGTACCAGCTGAGAGACTCTAAATCCAGTGACAAGTCTGTCTGCCTATT<br>CACCGATTTTGATTCTCAAACAAATGTGTACAAAAGTAAGGATTCTGATGTGTATATCAC<br>AGACAAAACCTGTGCTAGACATGAGGTCTATGGACTTCAAGAGCAACAGTGTCTGGCCCT<br>GGAGCAACAAATCTGACTTTGCATGTGCAAAACGCCTTCAACAACAGCATTATTCCAGAA<br>GACACCTTCTTCCCCAGCCCAGAAAGTTCTCTGTGATGTCAAGCTGGTCGAGAAAAAGCTTT<br>GAAACAGATACGAACCTAAACTTTCAAACCTGTGAGTGGGTTCGCAATCCTCCTC<br>CTGAAAGTGGCCGGGTTAATCTGCTCATGACGCTGCGGCTGTGGTCCAGC |
| TRBV2                        | ATGGATACCTGGCT<br>CGTATGCTGGGCAA<br>TTTTAGTCTCTTGA<br>AAGCAGGACTCACA              | GAACCTGAAGTACCCAGACTCCAGCCATCAGGTCACACAGATGGGACAGGAAGTGAT<br>CTTGCGCTGTGTCCCCATCTCTAATCACTTATACTTCTATTGGTACAGACAAATCTTGGGG<br>CAGAAAGTCGAGTTTCTGGTTTCTTTTATAATAATGAAATCTCAGAGAAGTCTGAAATA<br>TTCCGATGATCAATTCTCAGTTGAAAGGCCCTGATGGATCAAATTTCACTCTGAAGATCCGG<br>TCCACAAAGCTGGAGGACTCAGCCATGTAC                                                                                                                                                   |
| TRBV3-1                      | ATGGGCTGCAGGCT<br>CCTCTGCTGTGTGG<br>TCTTCTGCCTCCTCC<br>AAGCAGGTCCCTTG             | GACACAGCTGTTTCCAGACTCCAAAATACCTGGTCACACAGATGGGAAACGACAAGTC<br>CATTAAATGTGAACAAAATCTGGGCCATGATACTATGTATTGGTATAAACAGGACTCTA<br>AGAAATTTCTGAAGATAATGTTTAGCTACAATAATAAGGAGCTCATTATAAATGAAACA<br>GTTCCAAATCGTTTCTACCTAAATCTCCAGACAAAGCTCACTTAAATCTTCACATCAAT<br>TCCCTGGAGCTTGGTGACTCTGCTGTGTAT                                                                                                                                                       |
| TRBV4-1                      | ATGGGCTGCAGGCT<br>GCTCTGCTGTGCGG<br>TTCTCTGTCTCCTGG<br>GAGCAGTTCACATA             | GAACTGAAGTACCCAGACACCAAAACACCTGGTCATGGGAATGACAAATAAGAAGTC<br>TTTGAAATGTGAACAACATATGGGGCACAGGGCTATGTATTGGTACAAGCAGAAAGCTA<br>AGAAGCCACCGGAGCTCATGTTGTCTACAGCTATGAGAACTCTCTATAAATGAAAGT<br>GTGCCAAGTCGCTTCTCACCTGAATGCCCAACAGCTCTCTTAAACCTTCACCTACAC<br>GCCCTGCAGCCAGAAGACTCAGCCCTGTAT                                                                                                                                                            |
| TRBV4-2                      | ATGGGCTGCAGGCT<br>GCTCTGCTGTGCGG<br>TTCTCTGTCTCCTGG<br>GAGCGGTCCCCATG             | GAAACGGGAGTTACGCAGACACCAAGACACCTGGTCATGGGAATGACAAATAAGAAGT<br>CTTTGAAATGTGAACAACATCTGGGGCATAACGCTATGTATTGGTACAAGCAAAGTGTCT<br>AAGAAGCCACTGGAGCTCATGTTTGTCTACAACCTTAAAGAAGCAGACTGAAAACAACAG<br>TGTGCCAAGTCGCTTCTCACCTGAATGCCCAACAGCTCTCACTTATTCTTCACCTACAC<br>ACCCTGCAGCCAGAAGACTCGGCCCTGTAT                                                                                                                                                     |
| TRBV4-3                      | ATGGGCTGCAGGCT<br>GCTCTGCTGTGCGG<br>TTCTCTGTCTCCTGG<br>GAGCGGTGAGTTG<br>GTCCCCATG | GAAACGGGAGTTACGCAGACACCAAGACACCTGGTCATGGGAATGACAAATAAGAAGT<br>CTTTGAAATGTGAACAACATCTGGGGCATAACGCTATGTATTGGTACAAGCAAAGTGTCT<br>AAGAAGCCACTGGAGCTCATGTTTGTCTACAGCTTGAAGAAGCGGTTGAAAACAACAG<br>TGTGCCAAGTCGCTTCTCACCTGAATGCCCAACAGCTCTCACTTATTCTTCACCTACAC<br>ACCCTGCAGCCAGAAGACTCGGCCCTGTAT                                                                                                                                                       |
| TRBV5-1                      | ATGGGCTCCAGGCT<br>GCTCTGTGGGTGC<br>TGCTTTGTCTCCTGG<br>GAGCAGGCCAGTA               | AAGGCTGGAGTCACTCAAACCTCAAGATATCTGATCAAAAACGAGAGGACAGCAAGTGA<br>CACTGAGCTGCTCCCCTATCTCTGGGCATAGGAGTGTATCCTGGTACCAACAGACCCCCAG<br>GACAGGGCCCTCAGTTCCTCTTTGAATACTTTCAGTGAGACACAGAGAAACAAGGAAAC<br>TTCCCTGGTTCGATTCTCAGGGCCAGTTCTCTAACTCTCGCTCTGAGATGAATGTGAGC<br>ACCTTGGAGCTGGGGGACTCGGCCCTTTAT                                                                                                                                                    |
| TRBV5-3                      | ATGGGCCCCGGGCT<br>CCTCTGTGGGAAC<br>TGCTTTATCTCCTGG<br>GAGCAGGCCAGTG               | GAGGCTGGAGTACCCAAAGTCCACACACCTGATCAAAAACGAGAGGACAGCAAGTGA<br>CTCTGAGATGCTCTCTATCTCTGGGCACAGCAGTGTGTCTGGTACCAACAGGCCCCCGG<br>GTCAGGGGCCCCAGTTTATCTTTGAATATGCTAATGAGTTAAGGAGATCAGAAGGAAAC<br>TTCCCTAATCGATTCTCAGGGCGCCAGTTCCATGACTGTTGCTCTGAGATGAATGTGAGT<br>GCCTTGGAGCTGGGGGACTCGGCCCTGTAT                                                                                                                                                       |
| TRBV5-4                      | ATGGGCCCTGGGCT<br>CCTCTGTGGGTGC<br>TGCTTTGTCTCCTGG                                | GAGACTGGAGTACCCAAAGTCCACACACCTGATCAAAAACGAGAGGACAGCAAGTGA<br>CTCTGAGATGCTCTCTCAGTCTGGGCACAACACTGTGTCTGGTACCAACAGGCCCTGG<br>GTCAGGGGCCCCAGTTTATCTTTAGTATTATAGGGAGGAAGAGAATGGCAGAGGAAAC                                                                                                                                                                                                                                                           |

|         |                                                                           |                                                                                                                                                                                                                                                                                               |
|---------|---------------------------------------------------------------------------|-----------------------------------------------------------------------------------------------------------------------------------------------------------------------------------------------------------------------------------------------------------------------------------------------|
|         | GAGCAGGCTCAGTG                                                            | TTCCCTCCTAGATTCTCAGGACTCCAGTTCCTAATTATAGCTCTGAGCTGAATGTGAAC<br>GCCTTGGAGCTGGACGACTCGGCCCTGTAT<br><br>BsaI site (T to A)                                                                                                                                                                       |
| TRBV5-5 | ATGGGCCCTGGGCT<br>CCTCTGCTGGGTGC<br>TGCTTTGCTCCTGG<br>GAGCAGGCCAGTG       | GACGCTGGAGTCACCCAAAGTCCCACACACCTGATCAAAAACGAGAGGACAGCAAGTGA<br>CTCTGAGATGCTCTCCTATCTCTGGGCACAAGAGTGTGTCTGGTACCAACAGGTCCTGG<br>GTCAGGGGCCCCAGTTTATCTTTTCAGTATTATGAGAAAAGAAGAGAGAGGAAAGAGGAAAC<br>TTCCCTGATCGATTCTCAGCTCGCCAGTTCCTAACTATAGCTCTGAGCTGAATGTGAAC<br>GCCTTGTGCTGGGGGACTCGGCCCTGTAT  |
| TRBV5-6 | ATGGGCCCCGGGCT<br>CCTCTGCTGGGCAC<br>TGCTTTGCTCCTGG<br>GAGCAGGCTTAGTG      | GACGCTGGAGTCACCCAAAGTCCCACACACCTGATCAAAAACGAGAGGACAGCAAGTGA<br>CTCTGAGATGCTCTCCTAAGTCTGGGCATGACACTGTGTCTGGTACCAACAGGCCCTGG<br>GTCAGGGGCCCCAGTTTATCTTTTCAGTATTATGAGGAGGAAGAGAGACAGAGAGGCAAC<br>TTCCCTGATCGATTCTCAGGTCACCAAGTTCCTAACTATAGCTCTGAGCTGAATGTGAAC<br>GCCTTGTGCTGGGGGACTCGGCCCTCTAT   |
| TRBV5-7 | ATGGGCCCCGGGCT<br>CCTCTGCTGGGTGC<br>TGCTTTGCTCCTAG<br>GAGAAGGCCAGTG       | GACGCTGGAGTCACCCAAAGTCCCACACACCTGATCAAAAACGAGAGGACAGCACGTGA<br>CTCTGAGATGCTCTCCTATCTCTGGGCACACCAGTGTGTCTCGTACCAACAGGCCCTGG<br>GTCAGGGGCCCCAGTTTATCTTTTCAGTATTATGAGAAAAGAAGAGAGAGGAAAGAGGAAAC<br>TTCCCTGATCAATTCTCAGGTCACCAAGTTCCTAACTATAGCTCTGAGCTGAATGTGAAC<br>GCCTTGTGCTAGGGGACTCGGCCCTCTAT |
| TRBV5-8 | ATGGGACCCAGGCT<br>CCTCTCTGGGCAC<br>TGCTTTGCTCCTCG<br>GAACAGGCCAGTG        | GAGGCTGGAGTCACACAAAGTCCCACACACCTGATCAAAAACGAGAGGACAGCAAGCGA<br>CTCTGAGATGCTCTCCTATCTCTGGGCACACCAGTGTGTACTGGTACCAACAGGCCCTGG<br>GTCTGGGCCCTCCAGTTCCTCTTTGGTATGACGAGGGTGAAGAGAGAAAACAGAGGAAAC<br>TTCCCTCCTAGATTTTCAGGTCGCCAGTTCCTAATTATAGCTCTGAGCTGAATGTGAAC<br>GCCTTGGAGCTGGAGGACTCGGCCCTGTAT  |
| TRBV6-1 | ATGAGCATCGGGCT<br>CCTGTGCTGTGTGG<br>CCTTTCTCCTGT<br>GGGCAAGTCCAGTG<br>AAT | GCTGGTGTACTCAGACCCCAAAATTCCAGGTCTGAAGACAGGACAGAGCATGACACT<br>GCAGTGTGCCAGGATATGAACCATAACTCCATGTACTGGTATCGACAAGACCCAGGCA<br>TGGGACTGAGGCTGATTTATTACTAGCTTCTGAGGGTACCAGTACAAAGGAGAAGTC<br>CCCAATGGCTACAATGTCTCCAGATTAACAAACGGGAGTTCTCGCTCAGGCTGGAGTC<br>GGCTGCTCCCTCCAGACATCTGTGTAC             |
| TRBV6-2 | ATGAGCCTCGGGCT<br>CCTGTGCTGTGGGG<br>CCTTTCTCCTGT<br>GGCAGGTCCAGTG         | AATGCTGGTGTACTCAGACCCCAAAATTCCGGGTCCTGAAGACAGGACAGAGCATGAC<br>ACTGCTGTGTGCCAGGATATGAACCATGAATACATGTACTGGTATCGACAAGACCCAG<br>GCATGGGGCTGAGGCTGATTCATTACTAGTGGTGAGGGTACAACCTGCCAAAGGAGAG<br>GTCCCTGATGGCTACAATGTCTCCAGATTAACAAAACAGAAATTCCTGCTGGGGTTGGA<br>GTCGGCTGCTCCCTCCCAACATCTGTGTAC       |
| TRBV6-3 | ATGAGCCTCGGGCT<br>CCTGTGCTGTGGGG<br>CCTTTCTCCTGT<br>GGCAGGTCCAGTG         | AATGCTGGTGTACTCAGACCCCAAAATTCCGGGTCCTGAAGACAGGACAGAGCATGAC<br>ACTGCTGTGTGCCAGGATATGAACCATGAATACATGTACTGGTATCGACAAGACCCAG<br>GCATGGGGCTGAGGCTGATTCATTACTAGTGGTGAGGGTACAACCTGCCAAAGGAGAG<br>GTCCCTGATGGCTACAATGTCTCCAGATTAACAAAACAGAAATTCCTGCTGGGGTTGGA<br>GTCGGCTGCTCCCTCCCAACATCTGTGTAC       |
| TRBV6-4 | ATGAGAATCAGGCT<br>CCTGTGCTGTGTGG<br>CCTTTCTCCTGT<br>GGCAGGTCCAGTG         | ATTGCTGGGATCACCCAGGCACCAACATCTCAGATCCTGGCAGCAGGACGGCGCATGAC<br>ACTGAGATGTACCCAGGATATGAGACATAATGCCATGTACTGGTATAGACAAGATCTAG<br>GACTGGGGCTAAGGCTCATCCATTATTCAAACTGCAGGTACCAGTGGCAAAGGAGAA<br>GTCCCTGATGGTTATAGTGTCTCCAGAGCAACACAGATGATTTCCCTCAGCTTGGCG<br>TCTGCTGTACCCTCTCAGACATCTGTGTAC        |
| TRBV6-5 | ATGAGCATCGGCCT<br>CCTGTGCTGTGCAG<br>CCTTGTCTCCTGT<br>GGCAGGTCCAGTG        | AATGCTGGTGTACTCAGACCCCAAAATTCCAGGTCTGAAGACAGGACAGAGCATGAC<br>ACTGCAGTGTGCCAGGATATGAACCATGAATACATGTCTGGTATCGACAAGACCCAG<br>GCATGGGGCTGAGGCTGATTCATTACTAGTGGTGCTGGTATCACTGACCAAGGAGAA<br>GTCCCAATGGCTACAATGTCTCCAGATTAACAAAACAGAGGATTTCCCGCTCAGGCTGCTG<br>TCGGCTGCTCCCTCCAGACATCTGTGTAC         |
| TRBV6-6 | ATGAGCATCAGCCT<br>CCTGTGCTGTGCAG<br>CCTTTCTCCTGT<br>GGCAGGTCCAGTG         | AATGCTGGTGTACTCAGACCCCAAAATTCCGCATCCTGAAGATAGGACAGAGCATGAC<br>ACTGCAGTGTACCCAGGATATGAACCATGAATACATGTACTGGTATCGACAAGACCCAG<br>GCATGGGGCTGAGGCTGATTCATTACTAGTGGTGCTGGTATCACTGATAAAGGAGAA<br>GTCCCAATGGCTACAACGTCTCCAGATCAACCACAGAGGATTTCCCGCTCAGGCTGGA<br>GTTGGCTGCTCCCTCCAGACATCTGTGTAC        |
| TRBV6-7 | ATGAGCCTCGGGCT                                                            | AATGCTGGTGTACTCAGACCCCAAAATTCCACGTCTGAAGACAGGACAGAGCATGAC                                                                                                                                                                                                                                     |



|         |                                                                           |                                                                                                                                                                                                                                                                                              |
|---------|---------------------------------------------------------------------------|----------------------------------------------------------------------------------------------------------------------------------------------------------------------------------------------------------------------------------------------------------------------------------------------|
|         | CCTGTGCTGTGTGG<br>CCTTTTCTCTCCTGT<br>GGGCAGGTCCAATG                       | TCTGCTGTGTGCCAGGATATGAACCATGAATACATGTATCGGTATCGACAAGACCCAG<br>GCAAGGGGCTGAGGCTGATTTACTACTCAGTTGCTGCTGCTCTCACTGACAAAGGAGAA<br>GTTCCCAATGGCTACAATGTCTCCAGATCAAACACAGAGGATTTCCCCCTCAAGCTGGA<br>GTCAGCTGCTCCCTCTCAGACTTCTGTTTAC                                                                  |
| TRBV6-8 | ATGAGCCTCGGGCT<br>CCTGTGCTGTGCGG<br>CCTTTTCTCTCCTGT<br>GGGCAGGTCCCCTG     | AATGCTGGTGTCACTCAGACCCCAAAATTCACATCCTGAAGACAGGACAGAGCATGAC<br>ACTGCAGTGTGCCAGGATATGAACCATGGATACATGTCTGGTATCGACAAGACCCAG<br>GCATGGGGCTGAGACTGATTTACTACTCAGCTGCTGCTGGTACTACTGACAAAGAAAGTC<br>CCCAATGGCTACAATGTCTTAGATTAACACACAGAGGATTTCCCACTCAGGCTGGTGTCTG<br>GCTGCTCCCTCCCAGACATCTGTGTAC      |
| TRBV6-9 | ATGAGCATCGGGCT<br>CCTGTGCTGTGTGG<br>CCTTTTCTCTCCTGT<br>GGGAGGGTCCAGTG     | AATGCTGGTGTCACTCAGACCCCAAAATTCACATCCTGAAGACAGGACAGAGCATGAC<br>ACTGCAGTGTGCCAGGATATGAACCATGGATACTTGTCTGGTATCGACAAGACCCAG<br>GCATGGGGCTGAGGCGCATTCATTACTCAGTTGCTGCTGGTATCACTGACAAAGGAGAA<br>GTCCCCGATGGCTACAATGTATCCAGATCAAACACAGAGGATTTCCCGCTCAGGCTGGA<br>GTCAGCTGCTCCCTCCCAGACATCTGTATAC     |
| TRBV7-1 | ATGGGCACAAGGCT<br>CCTCTGCTGGGCAG<br>CCATATGTCTCCTG<br>GGGCAGATCACAC<br>A  | GGTGTGGAGTCTCCAGTCCCTGAGACACAAGGTAGCAAAGAAGGGAAAGGATGTAG<br>CTCTCAGATATGATCCAATTCAGGTCATAATGCCCTTTATTGGTACCGACAGAGCCTGG<br>GGCAGGGCCTGGAGTTTCCAATTTACTTCCAAGGCAAGGATGCAGCAGACAAATCGGGG<br>CTTCCCGTGATCGGTTCTCTGCACAGAGGCTGAGGGATCCATCTCCACTCTGAAGTTC<br>CAGCGCACACAGCAGGGGGACTTGGCTGTGTAT    |
| TRBV7-2 | ATGGGCACCAGGCT<br>CCTCTTCTGGGTGG<br>CCTTCTGTCTCCTGG<br>GGGCAGATCACACA     | GGAGCTGGAGTCTCCAGTCCCCAGTAACAAGGTCACAGAGAAGGGAAAGGATGTAG<br>AGCTCAGGTGTGATCCAATTCAGGTCATACTGCCCTTTACTGGTACCGACAGAGCCTGG<br>GGCAGGGCCTGGAGTTTTTAATTTACTTCCAAGGCAACAGTGCACCAGACAAATCAGGG<br>CTGCCAGTGATCGCTTCTCTGCAGAGAGGACTGGGGGATCCGTCTCCACTCTGACGATC<br>CAGCGCACACAGCAGGAGGACTCGGCCGTGTAT   |
| TRBV7-3 | ATGGGCACCAGGCT<br>CCTCTGCTGGGCAG<br>CCCTGTGCCTCCTG<br>GGGCAGATCACAC<br>A  | GGTGTGGAGTCTCCAGACCCCAAGTAACAAGGTCACAGAGAAGGGAAAAATATGTAG<br>AGCTCAGGTGTGATCCAATTCAGGTCATACTGCCCTTTACTGGTACCGACAAAGCCTGG<br>GGCAGGGCCAGAGTTTCTAATTTACTTCCAAGGCACGGGTGCGGCAGATGACTCAGGG<br>CTGCCAACGATCGGTTCTTTCAGTCAAGGCTGAGGGATCCGTCTCTACTCTGAAGATC<br>CAGCGCACAGAGCGGGGGGACTCAGCCGTGTAT    |
| TRBV7-4 | ATGGGCACCAGGCT<br>CCTCTGCTGGGTGG<br>TCCTGGGTTTCCTA<br>GGGACAGATCACAC<br>A | GGTGTGGAGTCTCCAGTCCCCAAGGTACAAAGTCGCAAAGAGGGGACGGGATGTAGC<br>TCTCAGGTGTGATCCAATTTCCGGGTCATGTAACCCCTTTATTGGTACCGACAGACCCTGGG<br>GCAGGGCTCAGAGGTTCTGACTTACTCCAGAGTGATGCTCAACGAGACAAATCAGGGC<br>GGCCAGTGGTCGGTTCTCTGCAGAGAGGCTGAGAGATCCGTCTCCACTCTGAAGATC<br>CAGCGCACAGAGCAGGGGGACTCAGCTGTGTAT  |
| TRBV7-6 | ATGGGCACCAGTCT<br>CCTATGCTGGGTGG<br>TCCTGGGTTTCCTA<br>GGGACAGATCACAC<br>A | GGTGTGGAGTCTCCAGTCTCCAGGTACAAAGTCACAAAGAGGGGACAGGATGTAGC<br>TCTCAGGTGTGATCCAATTTCCGGGTCATGTATCCCTTTTATTGGTACCGACAGGCCCTGGG<br>GCAGGGCCAGAGTTTCTGACTTACTTCAATTTATGAAGCCCAACAAGACAAATCAGGGC<br>TGCCCAATGATCGGTTCTCTGCAGAGAGGCTGAGGGATCCATCTCCACTCTGACGATCC<br>AGCGCACAGAGCAGCGGGACTCGGCCATGTAT |
| TRBV7-7 | ATGGGTACCAGTCT<br>CCTATGCTGGGTGG<br>TCCTGGGTTTCCTA<br>GGGACAGATCACAC<br>A | GGTGTGGAGTCTCCAGTCTCCAGGTACAAAGTCACAAAGAGGGGACAGGATGTAAC<br>TCTCAGGTGTGATCCAATTTCCAGTCTGCAACCCCTTTATTGGTATCAACAGGCCCTGGG<br>GCAGGGCCAGAGTTTCTGACTTACTTCAATTTATGAAGCTCAACCAGACAAATCAGGGC<br>TGCCCAAGTATCGGTTCTCTGCAGAGAGGCTGAGGGATCCATCTCCACTCTGACGATTC<br>AGCGCACAGAGCAGCGGGACTCAGCCATGTAT   |
| TRBV7-8 | ATGGGCACCAGGCT<br>CCTCTGCTGGGTGG<br>TCCTGGGTTTCCTA<br>GGGACAGATCACAC<br>A | GGTGTGGAGTCTCCAGTCCCTAGGTACAAAGTCGCAAAGAGAGGACAGGATGTAGC<br>TCTCAGGTGTGATCCAATTTCCGGGTCATGTATCCCTTTTTTGGTACCAACAGGCCCTGGG<br>GCAGGGGCCAGAGTTTCTGACTTATTTCCAGAATGAAGCTCAACTAGACAAATCGGGC<br>TGCCCAAGTATCGGTTCTTTCAGAAAGGCTGAGGGATCCGTCTCCACTCTGAAGATCC<br>AGCGCACACAGCAGGAGGACTCCGCCGTGTAT    |
| TRBV7-9 | ATGGGCACCAGCCT<br>CCTCTGCTGGATGG<br>CCCTGTGTCTCCTG<br>GGGCAGATCACGC<br>A  | GATACTGGAGTCTCCAGAACCCAGACACAAGATCACAAAGAGGGGACAGAATGTAA<br>CTTTCAGGTGTGATCCAATTTCTGAACAACCCGCTTTATTGGTACCGACAGACCCTGG<br>GGCAGGGCCAGAGTTTCTGACTTACTTCCAGAATGAAGCTCAACTAGAAAAATCAAGG<br>CTGCTCAGTATCGGTTCTCTGCAGAGAGGCTAAGGGATCTTCTCCACCTTGGAGATC<br>CAGCGCACAGAGCAGGGGGACTCGGCCATGTAT       |
| TRBV9   | ATGGGCTTCAGGCT<br>CCTCTGCTGTGTGG                                          | GATTCTGGAGTACACAAACCCAAAGCACCTGATCACAGCAACTGGACAGCGAGTGAC<br>GCTGAGATGCTCCCTAGGCTGGAGATCTCTCTGTGTACTGGTACCAACAGAGCCTGGA                                                                                                                                                                      |

|          |                                                                                                                |                                                                                                                                                                                                                                                                                                |
|----------|----------------------------------------------------------------------------------------------------------------|------------------------------------------------------------------------------------------------------------------------------------------------------------------------------------------------------------------------------------------------------------------------------------------------|
|          | CCTTTTGTCTCCTGG<br>GAGCAGGCCAGTG                                                                               | CCAGGGCCTCCAGTTCCTCATTACAGTATTATAATGGAGAAGAGAGAGCAAAAAGGAAACA<br>TTCTTGAACGATTCTCCGCACAACAGTTCCTGACTTGCCTCTGAACTAAACCTGAGCT<br>CTCTGGAGCTGGGGGACTCAGCTTTGTAT<br><br>BsaI site (C to T)                                                                                                         |
| TRBV10-1 | ATGGGCACGAGGCT<br>CTTCTCTATGTGGC<br>CCTTTGTCTGCTGTG<br>GGCAGGACACAGG                                           | GATGCTGAAATCACCCAGAGCCCAAGACACAAGATCACAGAGACAGGAAGGCAGGTGA<br>CCTTGGCGTGTACCAGACTTGGAAACCACAACATATGTTCTGGTATCGACAAGACCTG<br>GGACATGGGCTGAGGCTGATCCATTACTCATATGGTGTTCAGACTAACAAGGAGA<br>AGTCTCAGATGGCTACAGTGTCTCTAGATCAAACACAGAGGACCTCCCCCTACTCTGGA<br>GTCTGTGCTCCTCCCAGACATCTGTATAT            |
| TRBV10-2 | ATGGGCACGAGGCT<br>CTTCTCTATGTGGC<br>CCTTTGTCTGCTGTG<br>GGCAGGACACAGG                                           | GATGCTGGAATCACCCAGAGCCCAAGATACAAGATCACAGAGACAGGAAGGCAGGTGA<br>CCTTGATGTGTACCAGACTTGGAGCCACAGCTATATGTTCTGGTATCGACAAGACCTGG<br>GACATGGGCTGAGGCTGATCTAATACTCAGCAGCTGCTGATATTACAGATAAAGGAGAA<br>GTCCCCGATGGCTATGTTGTCTCCAGATCCAAGACAGAGAATTTCCCCCTACTCTGGAG<br>TCAGTACCCGCTCCCAGACATCTGTGTAT       |
| TRBV10-3 | ATGGGCACAAGGTT<br>GTTCTCTATGTGGC<br>CCTTTGTCTCCTGTG<br>GACAGGACACATG                                           | GATGCTGGAATCACCCAGAGCCCAAGACACAAGGTCACAGAGACAGGAACACCAGTGA<br>CTCTGAGATGTACCAGACTGAGAACCACCGCTATATGTACTGGTATCGACAAGACCCG<br>GGGCATGGGCTGAGGCTGATCCATTACTCATATGGTGTAAAGATACTGACAAAGGAGA<br>AGTCTCAGATGGCTATAGTGTCTCTAGATCAAAGACAGAGGATTTCTCTACTCTGGA<br>GTCCGCTACCAGCTCCCAGACATCTGTGTAC         |
| TRBV11-1 | ATGAGCACGAGGCT<br>TCTCTGTGGATGG<br>CCCTCTGTCTCCTGG<br>GGCAGAACTCTCA                                            | GAAGCTGAAGTTGCCAGTCCCCAGATATAAGATTACAGAGAAAAGCCAGGCTGTGGC<br>TTTTGGTGTGATCTATTTCTGGCCATGCTACCCTTTACTGGTACCGGACAGATCCTGGGA<br>CAGGGCCCGAGCTTCTGGTTCAATTTACAGATGAGAGTGTAGTAGATGATTCACAGTT<br>GCCTAAGGATCGATTTTCTGCAGAGAGGCTCAAAGGAGTAGACTCCACTCTCAAGATCC<br>AGCCTGCAGAGCTTGGGGACTCGGCCATGTAT     |
| TRBV11-2 | ATGGGCACGAGGCT<br>CCTCTGTGGGCGG<br>CCCTCTGTCTCCTGG<br>GAGCAGAACTCACA                                           | GAAGCTGGAGTTGCCAGTCTCCCAGATATAAGATTATAGAGAAAAGCCAGAGTGTGGC<br>TTTTGGTGTCAATCCTATATCTGGCCATGCTACCCTTTACTGGTACCGACAGATCCTGGG<br>ACAGGGCCCAAAGCTTCTGATTCAGTTTCAAGAATAACGGTGTAGTGGATGATTCACAGTT<br>GCCTAAGGATCGATTTTCTGCAGAGAGGCTCAAAGGAGTAGACTCCACTCTCAAGATCC<br>AGCCTGCAAAGCTTGGAGACTCGGCCGTGTAT |
| TRBV11-3 | ATGGGTACCAGGCT<br>CCTCTGTGGGTGG<br>CCTTCTGTCTCCTGG<br>TGGAAGAACTCATA                                           | GAAGCTGGAGTGGTTCAGTCTCCCAGATATAAGATTATAGAGAAAAACAGCCTGTGGC<br>TTTTGGTGTCAATCCTATTTCTGGCCACAATACCCTTTACTGGTACCTGCAGAACTTGGG<br>ACAGGGCCCGAGCTTCTGATTCGATATGAGAATGAGGAAGCAGTAGACGATTCACAGT<br>TGCCTAAGGATCGATTTTCTGCAGAGAGGCTCAAAGGAGTAGACTCCACTCTCAAGATC<br>CAGCCTGCAGAGCTTGGGGACTCGGCCGTGTAT   |
| TRBV12-3 | ATGGACTCCTGGAC<br>CTTCTGTGTGTGTC<br>CCTTTGCATCCTGGT<br>AGCGAAGCATAACA                                          | GATGCTGGAGTTATCCAGTACCCCCGCCATGAGGTGACAGAGATGGGACAAGAAGTGAC<br>TCTGAGATGTAAACCAATTTAGGCCACAACCTCCTTTTCTGGTACAGACAGACCATGAT<br>GCGGGGACTGGAGTTGCTCATTACTTTAACAACAACGTTCCGATAGATGATTCAGGGAT<br>GCCCCGAGGATCGATTCTCAGCTAAGATGCCTAATGCATCATTCTCCACTCTGAAGATCCA<br>GCCCTCAGAACCAGGGACTCAGCTGTGTAC   |
| TRBV12-4 | ATGGGCTCCTGGAC<br>CCTCTGTGTGTGTC<br>CCTTTGCATCCTGGT<br>AGCAAAGCACACA                                           | GATGCTGGAGTTATCCAGTACCCCCGGCACGAGGTGACAGAGATGGGACAAGAAGTGA<br>CTCTGAGATGTAAACCAATTTAGGACACGACTACCTTTTCTGGTACAGACAGACCATGA<br>TGCGGGGACTGGAGTTGCTCATTACTTTAACAACAACGTTCCGATAGATGATTCAGGGA<br>TGCCCCGAGGATCGATTCTCAGCTAAGATGCCTAATGCATCATTCTCCACTCTGAAGATCC<br>AGCCCTCAGAACCAGGGACTCAGCTGTGTAC   |
| TRBV12-5 | ATGGCCACGAGGCT<br>CCTCTGTGTGTGG<br>TTCTTTGTCTCCTGG<br>GAGAAGAGCTTATA                                           | GATGCTAGAGTACCCAGACACCAAGGCACAAGGTGACAGAGATGGGACAAGAAGTAA<br>CAATGAGATGTACAGCAATTTAGGCCACAATACTGTTTCTGGTACAGACAGACCATGA<br>TGCAAGGACTGGAGTTGCTGGCTTACTTCCGCAACCAGGCTCCTCTAGATGATTCGGGGA<br>TGCCGAAGGATCGATTCTCAGCAGAGATGCCTGATGCAACTTTAGCCACTCTGAAGATC<br>CAGCCCTCAGAACCAGGGACTCAGCTGTGTAT     |
| TRBV13   | ATGCTTAGTCTCTGA<br>CTGCTGACTCTG<br>CCTGGAACACCAGG<br>CTCCTCTGCCATGTC<br>ATGCTTTGTCTCCTG<br>GGAGCAGTTTCACT<br>G | GCTGCTGGAGTCACTCCAGTCCCCAAGACATCTGATCAAAGAAAAGAGGGAAACAGCCAC<br>TCTGAAATGCTATCCTATCCCTAGACACGACTGTCTACTGGTACCAGAGGGTCCAGG<br>TCAGGACCCCGAGTTCCTCATTTCGTTTATGAAAAGATGCAGAGCGATAAAGGAAGCA<br>TCCCTGATCGATTCTCAGCTCAACAGTTCAGTACTATCATTCTGAACTGAACATGAGCT<br>CCTTGGAGCTGGGGGACTCAGCCCTGTAC        |

|          |                                                                                                 |                                                                                                                                                                                                                                                                                                |
|----------|-------------------------------------------------------------------------------------------------|------------------------------------------------------------------------------------------------------------------------------------------------------------------------------------------------------------------------------------------------------------------------------------------------|
| TRBV14   | ATGGTTTCCAGGCT<br>TCTCAGTTTAGTGTG<br>CCTTTGTCTCCTGGG<br>AGCAAAGCACATA                           | GAAGCTGGAGTTACTCAGTTCGCCAGCCACAGCGTAATAGAGAAGGGCCAGACTGTGAC<br>TCTGAGATGTGACCCAATTCTGGACATGATAATCTTTATTGGTATCGACGTGTTATGGG<br>AAAAGAAATAAAATTTCTGTTACATTTTGTGAAAGAGTCTAAACAGGATGAGTCCGGTA<br>TGCCCAACAATCGATTCTTAGCTGAAAGGACTGGAGGGACGTATTCTACTCTGAAGGTG<br>CAGCCTGCAGAACTGGAGGATTCTGGAGTTTAT  |
| TRBV15   | ATGGGTCTGGGCT<br>TCTCCACTGGATGG<br>CCCTTTGTCTCCTTG<br>GAACAGGTCATGGG                            | GATGCCATGGTCATCCAGAACCCAAGATACCAGGTTACCCAGTTTGGAAAGCCAGTGAC<br>CCTGAGTTGTTCTCAGACTTTGAACCATAACGTCATGTACTGGTACCAGCAGAAGTCAAG<br>TCAGGCCCAAGAGCTGCTGTTCCACTACTATGACAAAAGATTTAACAATGAAGCAGACA<br>CCCCTGATAACTTCCAATCCAGGAGGGCCGAACACTTCTTTCTGCTTTCTTGACATCCGCTC<br>ACCAGGCTGGGGGACACAGCCATGTAC    |
| TRBV16   | ATGAGCCCAATATT<br>CACCTGCATCACAA<br>TCCTTTGTCTGCTGG<br>CTGCAGGTTCTCT                            | GGTGAAGAAGTCGCCAGACTCCAAAACATCTTGTCTCAGAGGGGAAGGACAGAAAGCAA<br>AATTATATGTGCCCCAATAAAAAGGACACAGTTATGTTTTTGGTACCACAGGTCCTGA<br>AAAACGAGTTCAAGTCTTGTATTTCTTCCAGAATGAAAATGTCTTTGATGAAAACAGGTA<br>TGCCCAAGGAAAGATTTTCAGCTAAGTGCCTCCCAAATTCACCTGTAGCCTTGAGATCC<br>AGGCTACGAAGCTTGAGGATTACAGCAGTGTAT  |
| TRBV18   | ATGGACACCAGAGT<br>ACTCTGTGTGCGG<br>TCATCTGTCTTCTGG<br>GGGCAGGACTCTCA<br><br>BsaI (T to A)       | AATGCCGGCGTCATGCAGAACCCAAGACACCTGGTCAAGGAGGGGACAGGAGGCAA<br>GACTGAGATGCAGCCCAATGAAAGGACACAGTCACTGTTACTGGTATCGGCAGTCCCA<br>GAGGAAGGTCTGAAATTCATGGTTTATCTCCAGAAAAGAAAATATCATAGATGAGTCAGG<br>AATGCCAAAGGAACGATTTTCTGCTGAATTTCCAAAGAGGGGCCACAGCATCTGAGGA<br>TCCAGCAGGTAGTGCAGGAGATTCCGCAGCTTAT     |
| TRBV19   | ATGAGCAACCAGGT<br>GCTCTGCTGTGTGG<br>TCCTTTGTTTCTGG<br>GAGCAAACACCGTG                            | GATGGTGAATCACTCAGTCCCCAAAGTACCTGTTTCCAGAAAGGAAGGACAGAATGTGAC<br>CCTGAGTTGTGAACAGAATTTGAACCACGATGCCATGTACTGGTACCAGACAGGACCCAG<br>GGCAAGGGCTGAGATTGATCTACTACTACAGATAAGTAAATGACTTTTCCAGAAAGGAGAT<br>ATAGCTGAAGGGTACAGCTCTCGGGAGAAGAAGGAATCCTTTCTCTACTGTGAC<br>ATCGGCCCAAAAAGAACCCGACAGCTTTCTAT    |
| TRBV20-1 | ATGCTGCTGCTTCT<br>GCTGCTTCTGGGGC<br>CAGGTATAAGCCTC<br>CTTCTACCTGGGAG<br>CTTGGCAGGCTCCG<br>GGCTT | GGTGTGCTGCTCTCAACATCCGAGCTGGGTTATCTGTAAGAGTGGAACTCTGTGAAG<br>ATCGAGTGCCGTTCCCTGGACTTTCAGGCCACAACATGTTTTGGTATCGTCAGTTCCCG<br>AAACAGAGTCTCATGCTGATGGCAACTTCCAATGAGGGCTCCAAGGCCACATACGAGCA<br>AGGCGTCGAGAAGGACAAGTTTCTCATCAACCATGCAAGCCTGACCTGTCCACTCTGA<br>CAGTGACCAGTGCCCATCTGAAGACAGCAGCTTCTAC |
| TRBV24-1 | ATGGCCTCCCTGCT<br>CTTCTTCTGTGGGG<br>CCTTTTATCTCCTGG<br>GAACAGGGTCCATG                           | GATGCTGATGTTACCCAGACCCCAAGGAATAGGATCACAAAGACAGGAAAGAGGATTA<br>TGCTGGAATGTTCTCAGACTAAGGGTCATGATAGAATGTACTGGTATCGACAAGACCCA<br>GGACTGGGCCTACGGTTGATCTATTACTCTTTGATGTCAAAGATATAAACAAGGAGA<br>GATCTCTGATGGATACAGTGTCTCTCGACAGGCACAGGCTAAATCTCCCTGTCCCTAGA<br>GTCTGCCATCCCCAACCCAGACAGCTTTTAC       |
| TRBV25-1 | ATGACTATCAGGCT<br>CCTCTGCTACATGG<br>GCTTTTATTTCTGG<br>GGGCAGGCCTCATG                            | GAAGCTGACATCTACCAGACCCCAAGATACCTTGTATAGGGACAGGAAAGAAGATCAC<br>TCTGGAATGTTCTCAAACCATGGGCCATGACAAAATGTACTGGTATCAACAAGATCCAG<br>GAATGGAACCTACCTCATCCACTATTCTATGGAGTAAATCCACAGAGAAGGGAGAT<br>CTTTCTCTGAGTCAACAGTCTCCAGAATAAGGACGGAGCATTTTCCCCTGACCCTGGAG<br>TCTGCCAGGCCTCACATACCTCTCAGTAC          |
| TRBV27   | ATGGGCCCCAGCT<br>CCTTGGCTATGTGG<br>TCCTTTGCTTCTAG<br>GAGCAGGCCCCCTG                             | GAAGCCCAAGTGACCCAGAACCCAAGATACCTCATCACAGTGACTGGAAAGAAGTAAAC<br>AGTGACTTGTCTCAGAATATGAACCATGAGTATATGTCCTGGTATCGACAAGACCCAG<br>GGCTGGGCTTAAGGCAGATCTACTATTCAATGAATGTTGAGGTGACTGATAAGGGAGAT<br>GTTCTGAAGGGTACAAAGTCTCTCGAAAAGAGAAGAGGAATTTCCCCTGATCCTGGA<br>GTCGCCAGCCCAACCAGACCTCTCTGTAC         |
| TRBV28   | ATGGGAATCAGGCT<br>CCTGTGCTGTGTGG<br>CCTTTGTTCCTGG<br>CTGTAGGCCTCGTA                             | GATGTGAAAGTAACCCAGAGCTCGAGATATCTAGTCAAAAAGGACGGGAGAGAAAGTTTT<br>TCTGGAATGTGTCCAGGATATGGACATGAAAATATGTTCTGGTATCGACAAGACCCAG<br>GTCTGGGCTACGGCTGATCTATTTCTCATATGATGTTAAAATGAAAGAAAAGGAGAT<br>ATTCTGAGGGGTACAGTGTCTCTAGAGAGAAGAAGGAGCGCTTCTCCCTGATTTCTGGA<br>GTCCGCCAGCACCAACCAGACATCTATGTAC      |
| TRBV29-1 | ATGCTGAGTCTTCT<br>GCTCCTTCTCCTGG<br>GACTAGGCTCTGTG<br>TTC                                       | AGTGTGTCATCTCTCAAAAAGCCAAGCAGGGATATCTGTCAACGTGGAACCTCCCTGAC<br>GATCCAGTGTCAAGTGCATAGCCAAGTCACCATGATGTTCTGGTACCCTCAGCAACCTG<br>GACAGAGCCTGACACTGATCGCAACTGCAAAATCAGGGCTCTGAGGCCACATATGAGAGT<br>GGATTTGTCATTGACAAGTTTCCATCAGCCGCCCAACCTAACATTCTCAACTCTGACT                                       |

|        |                                                                 |                                                                                                                                                                                                                                                                                             |
|--------|-----------------------------------------------------------------|---------------------------------------------------------------------------------------------------------------------------------------------------------------------------------------------------------------------------------------------------------------------------------------------|
|        |                                                                 | GTGAGCAACATGAGCCCTGAAGACAGCAGCATATAT                                                                                                                                                                                                                                                        |
| TRBV30 | ATGCTCTGCTCTCTC<br>CTTGCCCTTCTCCTG<br>GGCACTTTCTTTGG<br>GGTCAGA | TTCAGACTATTCATCAATGGCCAGCGACCCTGGTGCAGCCTGTGGGCAGCCCGCTCTCT<br>CTGGAGTGC ACTGTGGAGGGAACATCAAACCCCAACCTATACTGGTACCGACAGGCTGC<br>AGGCAGGGGCCTCCAGCTGCTCTTCTACTCCGTTGGTATTGGCCAGATCAGCTCTGAGGT<br>GCCCCAGAATCTCTCAGCCTCCAGACCCCAAGGACCGGCAGTTCATCCTGAGTTCTAAGA<br>AGTCCTTCTCAGTGACTCTGGCTTCTAT |

Table S2. CDR3 oligonucleotide sequences (CDR3 $\alpha$ , CDR3 $\beta$ ) used to clone TCRs

| TCR    | V $\alpha$ -C $\beta$ Library | V $\beta$ -C $\alpha$ Library | Oligo Sequence                                                                                                                                                                                                                                                                                                                    |
|--------|-------------------------------|-------------------------------|-----------------------------------------------------------------------------------------------------------------------------------------------------------------------------------------------------------------------------------------------------------------------------------------------------------------------------------|
| EBNA3A | TRAV8-1                       | TRBV5-1                       | TCTAGATGGGGATCCGGTCTCTGTACTTCTGTGCTGGTCGCCTCGTTGATCAG<br>GGCGGTAACCTGATCTTCGGACAGGGAACGGAGTTATCTGTGAAACCAATA<br>TCCAGAACCCTGACTGAGACCATGCGGTGGTGGTGGTCTGGTCTGGTCTG<br>GTGGTGGTCTGGTGGTGGTCTCTTTATCTTTGCGCTTCTAGTATCGGCCTGG<br>CCGGCTATGAGCAGTACTTCGGGCCGGGCACCAGGCTCACGGTCCACAGAGGA<br>CCTTGAGACCAATCAAATCGGATCC                  |
| D1.1   | TRAV38-2/DV8                  | TRBV7-9                       | TCTAGATGGGGATCCGGTCTCTGTATTTCTGTGCTTATATTCAGGGAGCCAG<br>AAGCTGGTATTGGCCAAGGAACCAGGCTGACTATCAACCCAAATATCCAGA<br>ACCCTGACAGAGACCATGCGGTGGTGGTGGTCTGGTCTGGTCTGGTGGTG<br>GTTCTGGTGGTGGTCTCTGTATCTCTGTGCCAGCAGCTTAGGTGGGGGGGAG<br>GGAGGCCAGTCTACGAGCAGTACTTCGGGCCGGGCACCAGGCTCACGGTCA<br>CAGAGACCTAGAGACCAATCAAATCGGATCC               |
| D1.2   | TRAV21                        | TRBV10-2                      | TCTAGATGGGGATCCGGTCTCTACCTCTGTGCTGTCTCATGGATAGCAAC<br>TATCAGTTAATCTGGGGCGCTGGGACCAAGCTAATTATAAAGCCAGATATCC<br>AGAACCCTGACAGAGACCATGCGGTGGTGGTGGTCTGGTCTGGTCTGGTG<br>GTGGTCTGGTGGTGGTCTCTGTATTTCTGCGCCAGCAGTTCGGACGGGATG<br>AACACTGAAGCTTCTTTGGACAAGGCACCAGACTCACAGTTGTAGAGGACC<br>TAGAGACCAATCAAATCGGATCC                         |
| D1.3   | TRAV5                         | TRBV29-1                      | TCTAGATGGGGATCCGGTCTCTACTTCTGTGCAGAGAGTACAGGCCAAACTA<br>ATCTTTGGCAAGGGACAACTTACAAGTAAAACCAGATATCCAGAACCCCTG<br>ACAGAGACCATGCGGTGGTGGTGGTCTGGTCTGGTCTGGTCTGGTCTG<br>GTGGTGGTCTTTATATCTCTGCAGCGTTGGGACCGGGGGCCTAATGAAAAA<br>CTGTTTTTGGCAGTGAACCCAGCTCTGTCTTGAGGACCTAGAGACCA<br>TCAAATCGGATCC                                        |
| D1.4   | TRAV12-2                      | TRBV19                        | TCTAGATGGGGATCCGGTCTCTACCTCTGTGCCGGCGACTTTGAAGGCTCT<br>GGCAACACAGGCAAACTAATCTTTGGCAAGGGACAACTTACAAGTAAAAC<br>CAGATATCCAGAACCCCTGACAGAGACCATGCGGTGGTGGTGGTCTGGTCTG<br>GTTCTGGTGGTGGTCTGGTGGTGGTCTCTTCTATCTCTGTGCCAGTAGCATCA<br>GGTCCGCCTACGAGCAGTACTTCGGGCCGGGCACCAGGCTCACGGTCCACAGA<br>GGACCTAGAGACCAATCAAATCGGATCC               |
| D1.5   | TRAV4                         | TRBV12-3                      | TCTAGATGGGGATCCGGTCTCTGTACTACTGCCTCGTGCCCGGAGAGATGAC<br>AAGATCATCTTTGAAAAGGGACACGACTTCATATTCTCCCAATATCCAGAA<br>CCCTGACAGAGACCATGCGGTGGTGGTGGTCTGGTCTGGTCTGGTGGTGG<br>TTCTGGTGGTGGTCTCTGTACTTCTGTGCCAGCAGTCTACCAGGGGCGGGG<br>GACTTGAAAAACTGTTTTTGGCAGTGAACCCAGCTCTGTCTTGAGGAGAC<br>CTAGAGACCAATCAAATCGGATCC                        |
| D1.6   | TRAV19                        | TRBV19                        | TCTAGATGGGGATCCGGTCTCTATACTTCTGTGCTCTGAGTGAGGGCGGGGACA<br>GGAGGAAGCTACATACCTACATTTGGAAGAGGAACCAGCCTATTGTTTCATCC<br>GTATATCCAGAACCCCTGACAGAGACCATGCGGTGGTGGTGGTCTGGTCTGG<br>TTCTGGTGGTGGTCTGGTGGTGGTCTCTTCTATCTCTGTGCCAGTAGTATATT<br>CGGGGGGAAAGAGCAGTCTTCGGGCCAGGGACACGGCTCACCGTGTAGAG<br>GACCTAGAGACCAATCAAATCGGATCC             |
| D1.7   | TRAV3                         | TRBV19                        | TCTAGATGGGGATCCGGTCTCTGTACTTCTGTGCTGTGAGAGATCCATTTCGG<br>AATTACAGGAAACACACCTCTTGTCTTTGGAAAAGGGCACAAGACTTTCTGTGAT<br>TGCAAATATCCAGAACCCCTGACAGAGACCATGCGGTGGTGGTGGTCTGGTTC<br>TGGTCTGGTGGTGGTCTGGTGGTGGTCTCTTCTATCTCTGTGCCAGTAGTAC<br>TTATTTCGGGAGTGGGACTGAAGCTTTCTTTGGACAAGGCACCAGACTCACA<br>GTTGTAGAGGACCTAGAGACCAATCAAATCGGATCC |
| D1.8   | TRAV27                        | TRBV19                        | TCTAGATGGGGATCCGGTCTCTACCTCTGTGGGTATGGAGGAAGCCAAGG<br>AAATCTCATCTTTGAAAAGGCACTAAACTCTCTGTAAACCAAAATATCCAGA<br>ACCCTGACAGAGACCATGCGGTGGTGGTGGTCTGGTCTGGTCTGGTGGTG<br>GTTCTGGTGGTGGTCTCTATCTCTGTGCCAGTAGTATTCTCGAGCTACG<br>AGCAGTACTTCGGGCCGGGCACCAGGCTCACGGTCCACAGAGGACCTAGAGAC<br>CAATCAAATCGGATCC                                |
| D1.9   | TRAV13-1                      | TRBV19                        | TCTAGATGGGGATCCGGTCTCTACTTCTGTGCAGCAAGCGGGGGAGGAAG<br>CCAAGGAAATCATCTTTGAAAAGGCCTAAACTCTCTGTAAACCAAAATA<br>TCCAGAACCCTGACAGAGACCATGCGGTGGTGGTGGTCTGGTCTGGTCTG<br>GTGGTGGTCTGGTGGTGGTCTCTTCTATCTCTGTGCCAGTAGTCCCCGGTCCG<br>GTATCGAGCAGTACTTCGGGCCGGGCACCAGGCTCACGGTCCACAGAGGACCT<br>AGAGACCAATCAAATCGGATCC                         |
| D2.1   | TRAV21                        | TRBV10-2                      | TCTAGATGGGGATCCGGTCTCTACCTCTGTGCTGTCTCATGGATAGCAAC<br>TATCAGTTAATCTGGGGCGCTGGGACCAAGCTAATTATAAAGCCAGATATCC<br>AGAACCCTGACTGAGACCATGCGGTGGTGGTGGTCTGGTCTGGTCTGGTG<br>GTGGTCTGGTGGTGGTCTCTTGTATTTCTGCGCCAGCCAAGCGGACGGGATG                                                                                                          |

|      |              |          |                                                                                                                                                                                                                                                                                                                             |
|------|--------------|----------|-----------------------------------------------------------------------------------------------------------------------------------------------------------------------------------------------------------------------------------------------------------------------------------------------------------------------------|
|      |              |          | AACACTGAAGCTTCTTTGGACAAGGCACCAGACTCACAGTTGTAGAGGACC<br>TTGAGACCAATCAAATCGGATCC                                                                                                                                                                                                                                              |
| D2.2 | TRAV38-2/DV8 | TRBV11-1 | TCTAGATGGGGATCCGGTCTCTGTATTTCTGTGCTTATAGGAGTATGTATTCA<br>GGAGGAGGTGCTGACGGACTCACCTTTGGCAAAGGGACTCATCTAATCATCC<br>AGCCCTATATCCAGAACCCTGACAGAGACCATGCGGTGGTGGTGGTCTGGTT<br>CTGGTTCTGGTGGTGGTCTGGTGGTGGTCTCTGTATCTCTGTGCCAGCAGCC<br>TAGGGTACGGCAATCAGCCCCAGCATTTTGGTGTAGGGACTCGACTCTCCATC<br>CTAGAGGACCTAGAGACCAATCAAATCGGATCC |
| D2.3 | TRAV2        | TRBV9    | TCTAGATGGGGATCCGGTCTCTTTACTACTGTGCTGTGGACAACCAGGCAGGA<br>ACTGCTCTGATCTTTGGGAAGGGAACCACCTTATCAGTGAGTTCCAATATCCA<br>GAACCCTGACAGAGACCATGCGGTGGTGGTGGTCTGGTTCTGGTTCTGGTGG<br>TGGTTCTGGTGGTGGTCTTTGTATTTCTGTGCCAGCAGCGTAGAAGGGACGT<br>TCAACGGCTACACCTTCGGTTCGGGGACCAGGTTAACCGTTGTAGAGGACCTA<br>GAGACCAATCAAATCGGATCC            |
| D2.4 | TRAV12-1     | TRBV27   | TCTAGATGGGGATCCGGTCTCTACCTCTGTGTGGTGAACAAACCTAACGAC<br>TACAAGCTCAGCTTTGGAGCCGGAACCACAGTAACTGTAAGAGCAAATATCC<br>AGAACCCTGACTGAGACCATGCGGTGGTGGTGGTCTGGTTCTGGTTCTGGTGG<br>GTGGTTCTGGTGGTGGTCTTTGTACTTCTGTGCCAGCAGCAGTGGGACTAGC<br>GGGTATTACATGAGCAGTTCTTCGGGCCAGGGACACGGCTCACCGTGCTAG<br>AGGACCTTGAGACCAATCAAATCGGATCC        |
| D2.5 | TRAV38-1     | TRBV19   | TCTAGATGGGGATCCGGTCTCTGTATTTCTGTGCTTTCATGACGAATGCTGGT<br>GGTACTAGCTATGGAAAGCTGACATTTGGACAAGGGACCATCTTGACTGTCC<br>ATCCAAATATCCAGAACCCTGACAGAGACCATGCGGTGGTGGTGGTCTGGTT<br>CTGGTTCTGGTGGTGGTCTGGTGGTGGTCTCTTATCTCTGTGCCAGTAGTG<br>CCGGAAGCTATGGCTACACCTTCGGTTCGGGGACCAGGTTAACCGTTGTAGA<br>GGACCTAGAGACCAATCAAATCGGATCC        |
| D2.6 | TRAV12-3     | TRBV29-1 | TCTAGATGGGGATCCGGTCTCTACCTCTGTGCAATGCACTCTAATAACGAC<br>TACAAGCTCAGCTTTGGAGCCGGAACCACAGTAACTGTAAGAGCAAATATCC<br>AGAACCCTGACAGAGACCATGCGGTGGTGGTGGTCTGGTTCTGGTTCTGGTGG<br>GTGGTTCTGGTGGTGGTCTTTATATCTCTGCAGCGTCCCAGGCCTTTGAACA<br>CTGAAGCTTTCTTTGGACAAGGCACCAGACTCACAGTTGTAGAGGACCTAGA<br>GACCAATCAAATCGGATCC                 |
| P1.1 | TRAV20       | TRBV5-1  | TCTAGATGGGGATCCGGTCTCTTTATCTCTGTGCTGGTGTGGTGGTACTAGCT<br>ATGGAAAGCTGACATTTGGACAAGGGACCATCTTGACTGTCCATCAAATATC<br>CAGAACCCTGACAGAGACCATGCGGTGGTGGTGGTCTGGTTCTGGTTCTGGT<br>GGTGGTTCTGGTGGTGGTCTTTTTATCTTTGCGCCAGCAGCTCCGGGACAGG<br>GGGAAACACCGGGGAGCTGTTTTTTGGAGAAGGCTCTAGGCTGACCGTACTG<br>GAGACCTAGAGACCAATCAAATCGGATCC      |
| P1.2 | TRAV22       | TRBV29-1 | TCTAGATGGGGATCCGGTCTCTTTATTCTGTGCTTGCAGCCTTTATAACCAGG<br>GAGGAAAGCTTATCTTCGGACAGGGAACGGAGTTATCTGTGAAACCAATAT<br>CCAGAACCCTGACTGAGACCATGCGGTGGTGGTGGTCTGGTTCTGGTTCTGG<br>TGGTGGTTCTGGTGGTGGTCTTTATATCTCTGCAGCGCTCGACAGGGCCTCG<br>ATCAGCCCCAGCATTTTGGTGTAGGGACTCGACTCTCCATCTAGAGGACCTT<br>GAGACCAATCAAATCGGATCC               |
| P1.3 | TRAV29/DV5   | TRBV29-1 | TCTAGATGGGGATCCGGTCTCTGTACTTCTGTGCAGCAAGCGCTAATGCTGGT<br>GGTACTAGCTATGGAAAGCTGACATTTGGACAAGGGACCATCTTGACTGTCC<br>ATCCAAATATCCAGAACCCTGACAGAGACCATGCGGTGGTGGTGGTCTGGTT<br>CTGGTTCTGGTGGTGGTCTGGTGGTGGTCTTTATATCTCTGCAGCAGCATCCG<br>GGACAGGGTTCCCGGGGAGCTGTTTTTTGGAGAAGGCTCTAGGCTGACCGT<br>ACTGGAGGACCTAGAGACCAATCAAATCGGATCC |
| P1.4 | TRAV8-4      | TRBV11-1 | TCTAGATGGGGATCCGGTCTCTGTACTTCTGTGCTGTGAGTGAATCAGGAACC<br>TACAAATACATCTTTGGAAACAGGCACCAGGCTGAAGGTTTGTAGCAAATATCC<br>AGAACCCTGACAGAGACCATGCGGTGGTGGTGGTCTGGTTCTGGTTCTGGTGG<br>GTGGTTCTGGTGGTGGTCTTTGTATCTCTGTGCCAGCAGCTTAGTCCGGAA<br>ACCTACGAGCAGTACTTCGGGCCGGGCACCAGGCTCACGGTCACAGAGGACC<br>TAGAGACCAATCAAATCGGATCC          |
| P1.5 | TRAV8-6      | TRBV10-3 | TCTAGATGGGGATCCGGTCTCTGTACTTCTGTGCTGTGATCCCCACCTCAGGA<br>ACCTACAAATACATCTTTGGAAACAGGCACCAGGCTGAAGGTTTTAGCAAATA<br>TCCAGAACCCTGACAGAGACCATGCGGTGGTGGTGGTCTGGTTCTGGTTCTGG<br>GTGGTGGTCTGGTGGTGGTCTTTGTACTTCTGTGCCATCAGGGGAAAGACG<br>GGCACCTACGAGCAGTACTTCGGCCGGGCACCAGGCTCACGGTCACAGAGG<br>ACCTAGAGACCAATCAAATCGGATCC         |
| P1.6 | TRAV9-2      | TRBV6-6  | TCTAGATGGGGATCCGGTCTCTGTACTTCTGTGCTGTGAGAGTCCCTCTGGTT<br>CTGCAAGGCAACTGACCTTTGGATCTGGGACAAATTGACTGTTTTACCTGAT<br>ATCCAGAACCCTGACAGAGACCATGCGGTGGTGGTGGTCTGGTTCTGGTTCT<br>GGTGGTGGTCTGGTGGTGGTCTTTGTACTTCTGTGCCAGCAGCATTTCCAGGG<br>GGCGGCGAACACCGGGGAGCTGTTTTTTGGAGAAGGCTCTAGGCTGACCGTA<br>CTGGAGGACCTAGAGACCAATCAAATCGGATCC |
| P3.1 | TRAV21       | TRBV29-1 | TCTAGATGGGGATCCGGTCTCTACCTCTGTGCTCCTACTAGCAACACAGGC                                                                                                                                                                                                                                                                         |

|      |            |          |                                                                                                                                                                                                                                                                                                                       |
|------|------------|----------|-----------------------------------------------------------------------------------------------------------------------------------------------------------------------------------------------------------------------------------------------------------------------------------------------------------------------|
|      |            |          | AAACTAATCTTTGGGCAAGGGACAACCTTACAAGTAAAACCAGATATCCAGA<br>ACCCTGACAGAGACCATGCGGTGGTGGTGGTCTGGTCTGGTCTGGTGGTG<br>GTTCTGGTGGTGGTCTCTTATATCTCTGCAGCGTTTTGGCGGTGGCCTCTCT<br>ACAATGAGCAGTTCTTCGGGCCAGGGACACGGCTACCCTGCTAGAGGACCT<br>AGAGACCAATCAAATCGGATCC                                                                   |
| P3.2 | TRAV12-1   | TRBV27   | TCTAGATGGGGATCCGGTCTCTACCTCTATCATAACCAGGGAGGAAAGCTT<br>ATCTTCGGACAGGGAACGGAGTTATCTGTGAAACCAATATCCAGAACCCTG<br>ACAGAGACCATGCGGTGGTGGTGGTCTGGTCTGGTCTGGTGGTGGTCTG<br>GTGGTGGTCTCTTGTACTTCTGTGCCAGCAGTCCCTCGTTGGCCGGGAGCTG<br>TTTTTGGAGAAGGCTCTAGGCTGACCGTACTGGAGGACCTAGAGACCAATC<br>AAATCGGATCC                         |
| P3.3 | TRAV38-1   | TRBV18   | TCTAGATGGGGATCCGGTCTCTGTATTCTGTGCTTTCATGAAGCCCTACA<br>GGTAACCAAGTTCTATTTTGGGACAGGGACAAGTTTGACGGTCATTCCAAATAT<br>CCAGAACCCTGACAGAGACCATGCGGTGGTGGTGGTCTGGTCTGGTCTGG<br>TGGTGGTCTGGTGGTGGTCTCTTATTTCTGTGCCAGCTACCGTACGGACA<br>GAACACTGAAGCTTTCTTTGGACAAGGCACCAGACTCACAGTTGTAGAGGAC<br>CTAGAGACCAATCAAATCGGATCC          |
| P3.4 | TRAV14/DV4 | TRBV5-4  | TCTAGATGGGGATCCGGTCTCTGTACTTCTGTGCAATGAGAGAGGGTAATAAT<br>GCAGGCAACATGCTCACCTTTGGAGGGGGAACAAGGTTAATGGTCAAACCC<br>ATATCCAGAACCCTGACAGAGACCATGCGGTGGTGGTGGTCTGGTCTGGT<br>CTGGTGGTGGTCTGGTGGTGGTCTCTGTATCTCTGTGCCAGCAGCTGGGT<br>GGAGGCCCCAGCATTTTGGTGATGGGACTCGACTCTCCATCTAGAGGACCT<br>AGAGACCAATCAAATCGGATCC             |
| P3.5 | TRAV8-2    | TRBV12-3 | TCTAGATGGGGATCCGGTCTCTGTACTTCTGTGTTGTGAGTGAGTACAACAAT<br>GACATGCGCTTTGGAGCAGGGACCAGACTGACAGTAAAACCAATATCCAGA<br>ACCCTGACAGAGACCATGCGGTGGTGGTGGTCTGGTCTGGTCTGGTGGTG<br>GTTCTGGTGGTGGTCTCTGTACTTCTGTGCCAGCAGTACCGCTAGAGGGGC<br>GTACGTCAGCCCCAGCATTTTGGTGATGGGACTCGACTCTCCATCTAGAGGA<br>CTAGAGACCAATCAAATCGGATCC         |
| P3.6 | TRAV38-1   | TRBV6-2  | TCTAGATGGGGATCCGGTCTCTGTATTCTGTGCTTTCATGAAGCCGGGCAAC<br>TTCAACAAATTTTACTTTGGATCTGGGACCAAACTCAATGTAACCAAAATAT<br>CCAGAACCCTGACAGAGACCATGCGGTGGTGGTGGTCTGGTCTGGTCTGG<br>TGGTGGTCTGGTGGTGGTCTCTTGTACTTCTGTGCCAGCACCTTGACAGGGC<br>ATTCTAGTGAGCAGTTCTTCGGGCCAGGGACACGGCTACCCTGCTAGAGGA<br>CTAGAGACCAATCAAATCGGATCC         |
| P3.7 | TRAV8-2    | TRBV15   | TCTAGATGGGGATCCGGTCTCTGTACTTCTGTGTTGTGAGTGACCAGGGACCC<br>AATGACATGCGCTTTGGAGCAGGGACCAGACTGACAGTAAAACCAATATCC<br>AGAACCCTGACAGAGACCATGCGGTGGTGGTGGTCTGGTCTGGTCTGGTG<br>GTGGTCTGGTGGTGGTCTCTTGTACTTGTGTGCCACCAGCAGCCCGTGGGC<br>GGGACTAGGGGGCCCCAGCATTTTGGTGATGGGACTCGACTCTCCATCTAGA<br>GGACCTAGAGACCAATCAAATCGGATCC     |
| C-1  | TRAV5      | TRBV5-1  | TCTAGATGGGGATCCGGTCTCTACTTCTGTGCAGAGATCCCCTTAGCAAC<br>ACAGGCAAACTAATCTTTGGCAAGGGACAACCTTACAAGTAAAACCAGATA<br>TCCAGAACCCTGACAGAGACCATGCGGTGGTGGTGGTCTGGTCTGGTCTG<br>GTGGTGGTCTGGTGGTGGTCTCTTTATCTTTGCGCCAGCAGCCCCCTAGTCG<br>CCACTGAAGCTTTCTTTGGACAAGGCACCAGACTCACAGTTGTAGAGGACCTA<br>GAGACCAATCAAATCGGATCC             |
| C-2  | TRAV26-1   | TRBV27   | TCTAGATGGGGATCCGGTCTCTGTACTATTGCATCGTCTAAACGACTACAAG<br>CTCAGCTTTGGAGCCGGAACCACAGTAACTGTAAGAGCAAATATCCAGAACC<br>CTGACAGAGACCATGCGGTGGTGGTGGTCTGGTCTGGTCTGGTGGTGGT<br>CTGGTGGTGGTCTCTTGTACTTCTGTGCCAGCAGTTAGACAGCTACAATGAG<br>CAGTTCTTCGGGCCAGGGACACGGCTACCCTGCTAGAGGACCTAGAGACCA<br>ATCAAATCGGATCC                    |
| C-3  | TRAV12-1   | TRBV12-3 | TCTAGATGGGGATCCGGTCTCTACCTCTGTGTGGTGAACATCGGGAACAT<br>GGTCAGAATTTGTCTTTGGTCCCGGAACCAGATTGTCCTGCTGCCCTATAT<br>CCAGAACCCTGACAGAGACCATGCGGTGGTGGTGGTCTGGTCTGGTCTGG<br>TGGTGGTCTGGTGGTGGTCTCTTGTACTTCTGTGCCAGCAGTTCTGTGACAGC<br>GTCCGACATGAACACTGAAGCTTTCTTTGGACAAGGCACCAGACTCACAGTTG<br>TAGAGGACCTAGAGACCAATCAAATCGGATCC |

Table S3. Peptide sequences

**Table S3A.** EBNA3A and BRLF1 peptide sequences

| HLA Allele | Virus/Antigen Name            | Peptide Sequence |
|------------|-------------------------------|------------------|
| A*24:02    | EBV EBNA3A <sub>246-254</sub> | RYSIFFDYM        |
| A*24:02    | EBV BRLF-1 <sub>198-206</sub> | TYPVLEEMF        |

**Table S3B.** CEF peptide sequences

| HLA Allele       | Virus/Antigen Name           | Peptide Sequence |
|------------------|------------------------------|------------------|
| A*01             | Influenza A                  | VSDGGPNLY        |
|                  | Influenza A                  | CTELKLSDY        |
| A*02             | Influenza M                  | GILGFVFTL        |
|                  | Influenza A                  | FMYSDFHFI        |
|                  | EBV LMP2A                    | CLGGLLTMV        |
|                  | EBV BMLF1 <sub>259-267</sub> | GLCTLVAML        |
| A*02:01          | HCMV pp65                    | NLVPMVATV        |
| A*68             | Influenza NP                 | KTGGPIYKR        |
| A*03             | Influenza NP                 | RVLSFIKGTK       |
|                  | Influenza A                  | ILRGSVAHK        |
|                  | EBV                          | RVRAYTYSK        |
|                  | EBV                          | RLRAEAQVK        |
| A*03, A*11, A*06 | Influenza M                  | SIIPSGPLK        |
| A*11             | EBV EBNA 4NP                 | AVFDRKSDAK       |
|                  | EBV                          | IVTDFSVIK        |
|                  | EBV                          | ATIGTAMYK        |
| A*24             | EBV RTA                      | DYCNVLNKEF       |
| B*07             | Influenza NP                 | LPFDKTTVM        |
|                  | EBV                          | RPPIFIRRL        |
| B*08             | Influenza NP                 | ELRSRYWAI        |
|                  | EBV BZLF-1                   | RAKFKQLL         |
|                  | EBV EBNA 3A                  | FLRGRAYGL        |
|                  | EBV EBNA 3                   | QAKWRLQTL        |
| B*18             | HCMV                         | SDEEEAIVAYTL     |
| B*27             | Influenza NP                 | SRYWAIRTR        |
|                  | Influenza M                  | ASCMGLIY         |



|         |             |            |
|---------|-------------|------------|
|         | EBV EBNA 3C | RRIYDLIEL  |
| B*35    | EBV EBNA3A  | YPLHEQHGM  |
|         | CMV pp65    | IPSINVHHY  |
| B*44    | EBV         | EENLLDFVRF |
|         | HCMV        | EFFWDANDIY |
| B*07:02 | HCMV        | TPRVTGGGAM |

**Table S3C.** Melanoma neoantigen peptide sequences

| <b>Patient</b> | <b>Antigen Name</b> | <b>Peptide Sequence (predicted HLA class I binding)</b>                                                                                                         |
|----------------|---------------------|-----------------------------------------------------------------------------------------------------------------------------------------------------------------|
| Patient 1      | <i>Mut-CASP5</i>    | IMP: LCPREEFLRLCKKIMMRSIQ<br>ASP CASP5-1: LCPREEFLRLCKKIM<br>ASP CASP5-2: EEFLRLCKKIMMRSIQ                                                                      |
|                | <i>Mut-RUSC2</i>    | IMP: SGSPPLRVSVGDFSQEFSPIQEAQQD<br>ASP RUSC2-1: SGSPPLRVSVGDFSQ<br>ASP RUSC2-2: PLRVSVGDFSQEFSP<br>ASP RUSC2-3: SVGDFSQEFSPIQEA<br>ASP RUSC2-4: DFSQEFSPIQEAQQD |
|                | <i>Mut-LUM</i>      | IMP: SHNELADSGIPENSFNVSSLVE<br>ASP LUM-1: SHNELADSGIPENSF<br>ASP LUM-1: LADSGIPENSFNVSS<br>ASP LUM-1: SGIPENSFNVSSLVE                                           |
| Patient 3      | <i>Mut-CIT</i>      | IMP: RGRLPAGAVRTLTSQVNK VWDQSS<br>EPT4A: TLLSQVNKV (HLA-A*02:01) (a)<br>EPT4C: VRTLTSQVNK (HLA-B*27:05) (b)                                                     |
|                | <i>Mut-CASPI</i>    | IMP: ERFWRNILLLSLHKGSLYPRIPGLGKE<br>EPT27A: WRNILLLSLH (HLA-B*27:05) (a)<br>EPT27C: SLHKGSLYPR (HLA-A*03:01) (b)                                                |
|                | <i>Mut-VPS16</i>    | IMP: GHEHQPDMMQKSLLR AAFGKCF LDR<br>EPT17A: SLLRAAFGK (HLA-A*03:01) (a)<br>EPT17C: LRAAFGKCF (HLA-B*27:05) (b)                                                  |
|                | <i>Mut-ENDOV</i>    | IMP: SPGPRTAPRPGSQKQAGKDWQ<br>EPT7A: RTAPRPGSQK (HLA-A*03:01)                                                                                                   |
|                | <i>Mut-ZNF234</i>   | IMP: HASHLQEHQRIYTGEKPFKCDT<br>EPT14A: RIYTGEKPFK (HLA-A*03:01)                                                                                                 |
|                | <i>Mut-CRY1</i>     | IMP: EDLDANLRKLNFR L FVIRGQPAD<br>EPT26A: KLNFR L FVI (HLA-A*02:01) (a)<br>EPT26C: RKNFR L FVI (HLA-B*27:05) (b)<br>EPT26D: KLNFR L FVIR (HLA-A*03:01) (c)      |
|                | <i>Mut-ADAMTS7</i>  | IMP: ELQYRGRELRFNLIANQHLLAPGFVSETR<br>EPT30A: LRFNLIANQH (HLA-B*27:05)                                                                                          |

**Table S3D.** CLL neoantigen peptide sequences

| <b>Predicted HLA class I binding</b> | <b>Antigen Name</b> | <b>Peptide Sequence</b> |
|--------------------------------------|---------------------|-------------------------|
| A*02:01                              | Mut- <i>MGA_106</i> | NLDQRLLMV               |
| A*02:01                              | Mut- <i>MGA_94</i>  | RLLMVHCPL               |
| A*02:01                              | Mut- <i>ITPKB</i>   | GLLHGLLLI               |
| A*02:01                              | Mut- <i>RBBP6</i>   | LLHHPQYHL               |
| A*02:01                              | Mut- <i>ZNF449</i>  | FTNSGSFAV               |

Table S4. TCR and housekeeping gene primer sequences

**Table S4A.** Sequences of TRAC and TRAV primers used in RT-PCR1. Obtained from Han et al, 2014<sup>10</sup>, with additional TRAV primers that we designed highlighted in blue.

| Name               | Sequence 5' to 3'           |
|--------------------|-----------------------------|
| TRAC-PCR1          | CGGTGAATAGGCAGACAGACTTGT    |
| TRAV1-1,2-PCR1     | CTGCACGTACCAGACATCTGGGTT    |
| TRAV2-PCR1         | GGCTCAAAGCCTTCTCAGCAGG      |
| TRAV3-PCR1         | GGATAACCTGGTTAAAGGCAGCTA    |
| TRAV4-PCR1         | GGATACAAGACAAAAGTTACAAACGA  |
| TRAV5-PCR1         | GCTGACGTATATTTTTTCAAATATGGA |
| TRAV6-PCR1         | GGAAGAGGCCCTGTTTTCTTGCT     |
| TRAV7-PCR1         | GCTGGATATGAGAAGCAGAAAGGA    |
| TRAV8-2, 4, 6-PCR1 | AGGACTCCAGCTTCTCCTGAAGTA    |
| TRAV8-1-PCR1       | GTATGTCCAGTACCCTGGTCAA      |
| TRAV8-3-PCR1       | CAGGAGACACTCTGGTTCAAG       |
| TRAV9-1, 2-PCR1    | GTATGTCCAATATCCTGGAGAAGGT   |
| TRAV10-PCR1        | CAGTGAGAACACAAAGTCGAACGG    |
| TRAV12-1-PCR1      | CCTAAGTTGCTGATGTCCGTATAC    |
| TRAV12-2-PCR1      | GGGAAAAGCCCTGAGTTGATAATGT   |
| TRAV12-3-PCR1      | GCTGATGTACACATACTCCAGTGG    |
| TRAV13-1-PCR1      | CCCTTGGTATAAGCAAGAACTTGG    |
| TRAV13-2-PCR1      | CCTCAATTCATTATAGACATTTCGTTC |
| TRAV14/DV4-PCR1    | GCAAAATGCAACAGAAGGTCGCTA    |
| TRAV16-PCR1        | TAGAGAGAGCATCAAAGGCTTCAC    |
| TRAV17-PCR1        | CGTTCAAATGAAAGAGAGAAACACAG  |
| TRAV18-PCR1        | CCTGAAAAGTTCAGAAAACCAGGAG   |
| TRAV19-PCR1        | GGTCGGTATTCTTGGA ACTTCCAG   |
| TRAV20-PCR1        | GCTGGGGAAGAAAAGGAGAAAGAAA   |
| TRAV21-PCR1        | GTCAGAGAGAGCAAACAAGTGGAA    |
| TRAV22-PCR1        | GGACAAAACAGAATGGAAGATTAAGC  |
| TRAV23/DV6-PCR1    | CCAGATGTGAGTGAAAAGAAAAGAAG  |
| TRAV24-PCR1        | GACTTTAAATGGGGATGAAAAGAAGA  |
| TRAV25-PCR1        | GGAGAAGTGAAGAAGCAGAAAAGAC   |
| TRAV26-1-PCR1      | CCAATGAAATGGCCTCTCTGATCA    |
| TRAV26-2-PCR1      | GCAATGTGAACAACAGAATGGCCT    |
| TRAV27-PCR1        | GGTGGAGAAGTGAAGAAGCTGAAG    |
| TRAV29/DV5-PCR1    | GGATAAAAATGAAGATGGAAGATTCAC |
| TRAV30-PCR1        | CCTGATGATATTACTGAAGGGTGGGA  |

|                   |                            |
|-------------------|----------------------------|
| TRAV34-PCR1       | GGTGGGGAAGAGAAAAGTCATGAA   |
| TRAV35-PCR1       | GGTGAATTGACCTCAAATGGAAGAC  |
| TRAV36/DV7-PCR1   | GCTAACTTCAAGTGAATTGAAAAGA  |
| TRAV36/DV7-PCR1.2 | ACGGCAGGAAAAGAAAGCTCCCA    |
| TRAV38-1,2-PCR1   | GAAGCTTATAAGCAACAGAATGCAAC |
| TRAV39-PCR1       | GGAGCAGTGAAGCAGGAGGGAC     |
| TRAV40-PCR1       | GAGAGACAATGGAAAACAGCAAAAAC |
| TRAV41-PCR1       | GCTGAGCTCAGGGAAGAAGAAGC    |

**Table S4B.** Sequences of TRBC and TRBV primers used in RT-PCR1. Obtained from Han et al, 2014<sup>10</sup>, with additional TRBV primers that we designed highlighted in blue.

| Name                | Sequence 5' to 3'            |
|---------------------|------------------------------|
| TRBC-PCR1           | ACCAGTGTGGCCTTTTGGGTGTG      |
| TRBV2-PCR1          | CTGAAATATTCGATGATCAATTCTCAG  |
| TRBV3-1-PCR1        | TCATTATAAATGAAACAGTTCCAAATCG |
| TRBV4-1, 2, 3-PCR1  | AGTGTGCCAAGTCGCTTCTCAC       |
| TRBV5-1-PCR1        | GAGACACAGAGAAACAAAGGAAACTTC  |
| TRBV5-4,8-PCR1      | CAGAGGAAACTYCCCTCCTAGATT     |
| TRBV5-5,6,7-PCR1    | CCAGTTCCTAACTATAGCTCTGA      |
| TRBV6-1-PCR1        | GGTACCACTGACAAAGGAGAAGTCC    |
| TRBV6-2,3-PCR1      | GAGGGTACAACCTGCCAAAGGAGAGGT  |
| TRBV6-4-PCR1        | GGCAAAGGAGAAGTCCCTGATGGTT    |
| TRBV6-5,6-PCR1      | AAGGAGAAGTCCCSAATGGCTACAA    |
| TRBV6-8-PCR1        | CTGACAAAGAAGTCCCAATGGCTAC    |
| TRBV6-9-PCR1        | CACTGACAAAGGAGAAGTCCCGAT     |
| TRBV6-9-PCR1.2      | TCGTGCTGCTGGTATCACTGACAA     |
| TRBV7-2-PCR1        | AGACAAATCAGGGCTGCCAGTGA      |
| TRBV7-3-PCR1        | GACTCAGGGCTGCCAACGAT         |
| TRBV7-8-PCR1        | CCAGAATGAAGCTCAACTAGACAA     |
| TRBV7-4,6-PCR1      | GGTTCTCTGCAGAGAGGCCTGAG      |
| TRBV7-7-PCR1        | GGCTGCCAGTGATCGTTTCTC        |
| TRBV7-9-PCR1        | GACTTACTTCCAGAATGAAGCTCAACT  |
| TRBV9-PCR1          | GAGCAAAAGGAAACATTCTTGAACGATT |
| TRBV10-1,3-PCR1     | GGCTRATCCATTACTCATATGGTGTT   |
| TRBV10-2-PCR1       | GATAAAGGAGAAGTCCCGATGGCT     |
| TRBV11-1, 2, 3-PCR1 | GATTCACAGTTGCCTAAGGATCGAT    |
| TRBV12-3,4-PCR1     | GATTCAGGGATGCCGAGGATCG       |
| TRBV12-5-PCR1       | GATTCGGGGATGCCGAAGGATCG      |
| TRBV13-PCR1         | GCAGAGCGATAAAGGAAGCATCCCT    |
| TRBV14-PCR1         | TCCGGTATGCCCAACAATCGATTCT    |
| TRBV15-PCR1         | GATTTTAAACAATGAAGCAGACACCCCT |
| TRBV16-PCR1         | GATGAAACAGGTATGCCCAAGGAAAG   |
| TRBV18-PCR1         | TATCATAGATGAGTCAGGAATGCCAAAG |
| TRBV19-PCR1         | GACTTTCAGAAAGGAGATATAGCTGAA  |
| TRBV20-1-PCR1       | CAAGGCCACATACGAGCAAGGCGTC    |
| TRBV24-1-PCR1       | CAAAGATATAAACAAAGGAGAGATCTCT |
| TRBV25-1-PCR1       | AGAGAAGGGAGATCTTTCCTCTGAGT   |
| TRBV27-PCR1         | GACTGATAAGGGAGATGTTTCCTGAAG  |

|               |                             |
|---------------|-----------------------------|
| TRBV28-PCR1   | GGCTGATCTATTTCTCATATGATGTAA |
| TRBV29-1-PCR1 | GCCACATATGAGAGTGGATTTGTCATT |
| TRBV30-PCR1   | GGTGCCCCAGAATCTCTCAGCCT     |

**Table S4C.** Sequences of housekeeping gene primers used in RT-PCR1.

| Gene   | Sequence 5' to 3'          |
|--------|----------------------------|
| ACTB-f | cgaAAGGCCAACCGCGAGAA       |
| B2M-f  | cgaTAGCTGTGCTCGCGCTAC      |
| PPIA-f | cgaACCGCCGAGGAAAACC        |
| RPS3-f | cgaGAGTCTCTGCGTTACAAACTCC  |
| UBB-f  | cgaTGCCCAGTGATGGCATT       |
| ACTB-r | cgtCATCACGATGCCAGTGGTAC    |
| B2M-r  | cgtTCGGATGGATGAAACCCAGAC   |
| PPIA-r | cgtCTGTCTTTGGGACCTTGTCT    |
| RPS3-r | cgtGAGTTTCCCAGACACCACAAC   |
| UBB-r  | cgtTACCATGCAACGAAACCTTTATT |

**Table S4D.** TRAV primers used in PCR2 (black). Obtained from Han et al, 2014<sup>10</sup>, with additional TRAV primers that we designed highlighted in blue. The TRAV primers are tailed with Illumina SBS3 sequence (green).

| Name                | Sequence 5' to 3'                                             |
|---------------------|---------------------------------------------------------------|
| TRAV1-1,2-PCR2      | ACACTCTTTCCCTACACGACGCTCTTCCGATCTAGGTCGTTTTTCTTCATTCCCTAGTC   |
| TRAV2-PCR2          | ACACTCTTTCCCTACACGACGCTCTTCCGATCTACGATAACAACATGACCTATGAACGG   |
| TRAV3-1-PCR2        | ACACTCTTTCCCTACACGACGCTCTTCCGATCTCTTTGAAGCTGAATTTAACAAGAGCC   |
| TRAV4-1-PCR2        | ACACTCTTTCCCTACACGACGCTCTTCCGATCTCTCCCTGTTTATCCCTGCCGAC       |
| TRAV5-1-PCR2        | ACACTCTTTCCCTACACGACGCTCTTCCGATCTAAACAAGACCAAGACTCACTGTTC     |
| TRAV6-PCR2          | ACACTCTTTCCCTACACGACGCTCTTCCGATCTAAGACTGAAGGTCACCTTTGATACC    |
| TRAV7-PCR2          | ACACTCTTTCCCTACACGACGCTCTTCCGATCTACTAAATGCTACATTACTGAAGAATGG  |
| TRAV8-2,4,6-PCR2    | ACACTCTTTCCCTACACGACGCTCTTCCGATCTGCATCAACGGTTTTGAGGCTGAATTTAA |
| TRAV8-1-PCR2        | ACACTCTTTCCCTACACGACGCTCTTCCGATCTTCAGCTTCTCCTCAAGTACTTTTCA    |
| TRAV8-3-PCR2        | ACACTCTTTCCCTACACGACGCTCTTCCGATCTAGGCTTTGAGGCTGAATTTAAGAGG    |
| TRAV9-1,2-PCR2      | ACACTCTTTCCCTACACGACGCTCTTCCGATCTGAAACCCTTCTTTCCACTTGGAGAA    |
| TRAV10-PCR2         | ACACTCTTTCCCTACACGACGCTCTTCCGATCTTACAGCAACTCTGGATGCAGACAC     |
| TRAV12-1, 2, 3-PCR2 | ACACTCTTTCCCTACACGACGCTCTTCCGATCTGAAGATGGAAGGTTTACAGCACA      |
| TRAV13-1-PCR2       | ACACTCTTTCCCTACACGACGCTCTTCCGATCTGACATTCGTTCAAATGTGGGGCAA     |
| TRAV13-2-PCR2       | ACACTCTTTCCCTACACGACGCTCTTCCGATCTGGCAAGGCCAAAGAGTCAACCGT      |
| TRAV14/DV4-PCR2     | ACACTCTTTCCCTACACGACGCTCTTCCGATCTTCCAGAAGGCAAGAAAATCCGCCA     |
| TRAV16-PCR2         | ACACTCTTTCCCTACACGACGCTCTTCCGATCTGCTGACCTAACAAAAGGCGAGACA     |
| TRAV17-PCR2         | ACACTCTTTCCCTACACGACGCTCTTCCGATCTTTAAGAGTCACGCTTGACACTTCCA    |
| TRAV18-PCR2         | ACACTCTTTCCCTACACGACGCTCTTCCGATCTGCAGAGGTTTTTCAGGCCAGTCTT     |
| TRAV19-PCR2         | ACACTCTTTCCCTACACGACGCTCTTCCGATCTTCCACCAGTTCCTCAACTTCACC      |
| TRAV20-PCR2         | ACACTCTTTCCCTACACGACGCTCTTCCGATCTGCCACATTAACAAAAGAAGGAAAGCT   |
| TRAV21-PCR2         | ACACTCTTTCCCTACACGACGCTCTTCCGATCTGCCTCGCTGGATAAATCATCAGGA     |
| TRAV22-PCR2         | ACACTCTTTCCCTACACGACGCTCTTCCGATCTACGACTGTCGCTACGGAACGCTA      |
| TRAV23/DV6-PCR2     | ACACTCTTTCCCTACACGACGCTCTTCCGATCTCACAAATCTCTTCAATAAAAAGTGCCA  |
| TRAV24-PCR2         | ACACTCTTTCCCTACACGACGCTCTTCCGATCTACGAATAAGTGCCACTCTTAATACCA   |
| TRAV25-PCR2         | ACACTCTTTCCCTACACGACGCTCTTCCGATCTGTTTGGAGAAGCAAAAAAGAACAGCT   |
| TRAV26.1-PCR2       | ACACTCTTTCCCTACACGACGCTCTTCCGATCTCAGAAGACAGAAAGTCCAGCACCT     |
| TRAV26.2-PCR2       | ACACTCTTTCCCTACACGACGCTCTTCCGATCTATCGCTGAAGACAGAAAGTCCAGT     |
| TRAV27-PCR2         | ACACTCTTTCCCTACACGACGCTCTTCCGATCTACTAACCTTTCAGTTTGGTGATGCAA   |
| TRAV29/DV5-PCR2     | ACACTCTTTCCCTACACGACGCTCTTCCGATCTCTTAAACAAAAGTGCCAAGCACCTC    |
| TRAV30-PCR2         | ACACTCTTTCCCTACACGACGCTCTTCCGATCTAATATCTGCTTCATTTAATGAAAAAAGC |
| TRAV34-PCR2         | ACACTCTTTCCCTACACGACGCTCTTCCGATCTCCAAGTTGGATGAGAAAAAGCAGCA    |
| TRAV35-PCR2         | ACACTCTTTCCCTACACGACGCTCTTCCGATCTCTCAGTTTGGTATAACCAGAAAAGGA   |
| TRAV36/DV7-PCR2     | ACACTCTTTCCCTACACGACGCTCTTCCGATCTGGAAGACTAAGTAGCATATTAGATAAG  |
| TRAV36/DV7-PCR2.2   | ACACTCTTTCCCTACACGACGCTCTTCCGATCTGTAGCATATTAGATAAGAAAAGAAC    |
| TRAV38-1,2-PCR2     | ACACTCTTTCCCTACACGACGCTCTTCCGATCTCTGTGAACTTCCAGAAAAGCAGCCA    |
| TRAV39-PCR2         | ACACTCTTTCCCTACACGACGCTCTTCCGATCTCCTCACTTGATACCAAAGCCCGT      |
| TRAV40-PCR2         | ACACTCTTTCCCTACACGACGCTCTTCCGATCTAGGCGGAAATATTAAGACAAAAACTC   |
| TRAV41-PCR2         | ACACTCTTTCCCTACACGACGCTCTTCCGATCTGATTAATTGCCACAATAAACATACAGG  |

**Table S4E.** TRBV primers used in PCR2 (black). Obtained from Han et al, 2014<sup>10</sup>, with additional TRBV primers that we designed highlighted in blue. The TRBV primers are tailed with Illumina SBS3 sequence (green).

| Name                    | Sequence 5' to 3'                                             |
|-------------------------|---------------------------------------------------------------|
| TRBV2-PCR2              | ACACTCTTTCCCTACACGACGCTCTTCCGATCTGCCTGATGGATCAAATTTCACTCTG    |
| TRBV3-1-PCR2            | ACACTCTTTCCCTACACGACGCTCTTCCGATCTTCTCACCTAAATCTCCAGACAAAGCT   |
| TRBV4-1,2,3-PCR2        | ACACTCTTTCCCTACACGACGCTCTTCCGATCTCCTGAATGCCCAACAGCTCTC        |
| TRBV5-4,8-PCR2          | ACACTCTTTCCCTACACGACGCTCTTCCGATCTCTGTGAGCTGAATGTGAACGCCT      |
| TRBV5-1-PCR2            | ACACTCTTTCCCTACACGACGCTCTTCCGATCTCGATTCTCAGGGCGCCAGTTCTCT     |
| <b>TRBV5-5,6,7-PCR2</b> | ACACTCTTTCCCTACACGACGCTCTTCCGATCTGCTGAATGTGAACGCCTTGTT        |
| TRBV6-1-PCR2            | ACACTCTTTCCCTACACGACGCTCTTCCGATCTTGGCTACAATGTCTCCAGATTAACAA   |
| TRBV6-2,3-PCR2          | ACACTCTTTCCCTACACGACGCTCTTCCGATCTCCCTGATGGCTACAATGTCTCCAGA    |
| TRBV6-4-PCR2            | ACACTCTTTCCCTACACGACGCTCTTCCGATCTGTGTCTCCAGAGCAAACACAGATGATT  |
| TRBV6-5,6-PCR2          | ACACTCTTTCCCTACACGACGCTCTTCCGATCTGTCTCCAGATCAACCACAGAGGAT     |
| TRBV6-8-PCR2            | ACACTCTTTCCCTACACGACGCTCTTCCGATCTGTCTTAGATTAACACAGAGGATTTCC   |
| TRBV6-9-PCR2            | ACACTCTTTCCCTACACGACGCTCTTCCGATCTGGCTACAATGTATCCAGATCAAACA    |
| <b>TRBV6-9-PCR2.2</b>   | ACACTCTTTCCCTACACGACGCTCTTCCGATCTCGATGGCTACAATGTATCCAGATCAA   |
| TRBV7-2-PCR2            | ACACTCTTTCCCTACACGACGCTCTTCCGATCTTCGCTTCTCTGCAGAGAGGACTGG     |
| TRBV7-3-PCR2            | ACACTCTTTCCCTACACGACGCTCTTCCGATCTCGGTTCTTTGCAGTCAGGCCTGA      |
| TRBV7-8-PCR2            | ACACTCTTTCCCTACACGACGCTCTTCCGATCTCCAGTGATCGCTTCTTTCAGAAA      |
| TRBV7-4,6-PCR2          | ACACTCTTTCCCTACACGACGCTCTTCCGATCTTCTCCACTCTGAMGATCCAGCGCA     |
| TRBV7-7-PCR2            | ACACTCTTTCCCTACACGACGCTCTTCCGATCTGCAGAGAGGCCTGAGGGATCCAT      |
| TRBV7-9-PCR2            | ACACTCTTTCCCTACACGACGCTCTTCCGATCTTGCAGAGAGGCCTAAGGGATCT       |
| TRBV9-PCR2              | ACACTCTTTCCCTACACGACGCTCTTCCGATCTCTCCGCACAACAGTTCCCTGACTT     |
| TRBV10-1,3-PCR2         | ACACTCTTTCCCTACACGACGCTCTTCCGATCTCAGATGGCTAYAGTGTCTCTAGATCAAA |
| TRBV10-2-PCR2           | ACACTCTTTCCCTACACGACGCTCTTCCGATCTGTTGTCTCCAGATCCAAGACAGAGAA   |
| TRBV11-1,2,3-PCR2       | ACACTCTTTCCCTACACGACGCTCTTCCGATCTGCAGAGAGGCTCAAAGGAGTAGACT    |
| TRBV12-3,4-PCR2         | ACACTCTTTCCCTACACGACGCTCTTCCGATCTGCTAAGATGCCTAATGCATCATTCTC   |
| TRBV12-5-PCR2           | ACACTCTTTCCCTACACGACGCTCTTCCGATCTCTCAGCAGAGATGCCTGATGCAACT    |
| TRBV13-PCR2             | ACACTCTTTCCCTACACGACGCTCTTCCGATCTTCTCAGCTCAACAGTTCAGTGACTA    |
| TRBV14-PCR2             | ACACTCTTTCCCTACACGACGCTCTTCCGATCTGCTGAAAGGACTGGAGGGACGTAT     |
| TRBV15-PCR2             | ACACTCTTTCCCTACACGACGCTCTTCCGATCTGATAACTCCAATCCAGGAGGCCG      |
| TRBV16-PCR2             | ACACTCTTTCCCTACACGACGCTCTTCCGATCTGCTAAGTGCCTCCCAAATTCACCC     |
| TRBV18-PCR2             | ACACTCTTTCCCTACACGACGCTCTTCCGATCTGGAACGATTTCTGTGTAATTTCCCA    |
| TRBV19-PCR2             | ACACTCTTTCCCTACACGACGCTCTTCCGATCTGGTACAGCGTCTCTCGGGAGAAGA     |
| TRBV20-1-PCR2           | ACACTCTTTCCCTACACGACGCTCTTCCGATCTGGACAAGTTTCTCATCAACCATGCAA   |
| TRBV24-1-PCR2           | ACACTCTTTCCCTACACGACGCTCTTCCGATCTTGGATACAGTGTCTCTCGACAGGC     |
| TRBV25-1-PCR2           | ACACTCTTTCCCTACACGACGCTCTTCCGATCTCAACAGTCTCCAGAATAAGGACGGA    |
| TRBV27-PCR2             | ACACTCTTTCCCTACACGACGCTCTTCCGATCTTACAAAGTCTCTCGAAAAGAGAAGAGGA |
| TRBV28-PCR2             | ACACTCTTTCCCTACACGACGCTCTTCCGATCTGGGGTACAGTGTCTCTAGAGAGA      |
| TRBV29-1-PCR2           | ACACTCTTTCCCTACACGACGCTCTTCCGATCTGTTTCCATCAGCCGCCAAACCTA      |
| TRBV30-PCR2             | ACACTCTTTCCCTACACGACGCTCTTCCGATCTCAGACCCAGGACCGGCAGTTCAT      |



**Table S4F.** TRAC primers used in PCR2. TRAC nested primer sequences (purple) were obtained from Han et al, 2014<sup>10</sup>. An inline barcode (blue) identifies the column on the 384 well plate. The primers are tailed with Illumina SBS12 sequence (black).

| Name       | Sequence 5' to 3'                                                  |
|------------|--------------------------------------------------------------------|
| TRAC       | GTGACTGGAGTTCAGACGTGTGCTCTTCCGATCTXXXXXXXXXAGACAGACTTGTCACTGGATTAG |
| TRAC-R2-1  | GTGACTGGAGTTCAGACGTGTGCTCTTCCGATCTAATGCGTTCAGACAGACTTGTCACTGGATTAG |
| TRAC-R2-2  | GTGACTGGAGTTCAGACGTGTGCTCTTCCGATCTGTCTTAGTCAGACAGACTTGTCACTGGATTAG |
| TRAC-R2-3  | GTGACTGGAGTTCAGACGTGTGCTCTTCCGATCTGAGAGTTGCAGACAGACTTGTCACTGGATTAG |
| TRAC-R2-4  | GTGACTGGAGTTCAGACGTGTGCTCTTCCGATCTGGAAGGCGCAGACAGACTTGTCACTGGATTAG |
| TRAC-R2-5  | GTGACTGGAGTTCAGACGTGTGCTCTTCCGATCTGATTACAGCAGACAGACTTGTCACTGGATTAG |
| TRAC-R2-6  | GTGACTGGAGTTCAGACGTGTGCTCTTCCGATCTGGCTAGGCCAGACAGACTTGTCACTGGATTAG |
| TRAC-R2-7  | GTGACTGGAGTTCAGACGTGTGCTCTTCCGATCTTGTGCTTACAGACAGACTTGTCACTGGATTAG |
| TRAC-R2-8  | GTGACTGGAGTTCAGACGTGTGCTCTTCCGATCTCAGCAGCACAGACAGACTTGTCACTGGATTAG |
| TRAC-R2-9  | GTGACTGGAGTTCAGACGTGTGCTCTTCCGATCTAGAACATTCAGACAGACTTGTCACTGGATTAG |
| TRAC-R2-10 | GTGACTGGAGTTCAGACGTGTGCTCTTCCGATCTCCTTACCTCAGACAGACTTGTCACTGGATTAG |
| TRAC-R2-11 | GTGACTGGAGTTCAGACGTGTGCTCTTCCGATCTTACCGCTGCAGACAGACTTGTCACTGGATTAG |
| TRAC-R2-12 | GTGACTGGAGTTCAGACGTGTGCTCTTCCGATCTCGAGTTAGCAGACAGACTTGTCACTGGATTAG |
| TRAC-R2-13 | GTGACTGGAGTTCAGACGTGTGCTCTTCCGATCTTCCGGTCCAGACAGACTTGTCACTGGATTAG  |
| TRAC-R2-14 | GTGACTGGAGTTCAGACGTGTGCTCTTCCGATCTGATGTTACCAGACAGACTTGTCACTGGATTAG |
| TRAC-R2-15 | GTGACTGGAGTTCAGACGTGTGCTCTTCCGATCTCCTGGATACAGACAGACTTGTCACTGGATTAG |
| TRAC-R2-16 | GTGACTGGAGTTCAGACGTGTGCTCTTCCGATCTTGATTACACAGACAGACTTGTCACTGGATTAG |
| TRAC-R2-17 | GTGACTGGAGTTCAGACGTGTGCTCTTCCGATCTATACCTGTCAGACAGACTTGTCACTGGATTAG |
| TRAC-R2-18 | GTGACTGGAGTTCAGACGTGTGCTCTTCCGATCTTTGATAATCAGACAGACTTGTCACTGGATTAG |
| TRAC-R2-19 | GTGACTGGAGTTCAGACGTGTGCTCTTCCGATCTAATGTTGGCAGACAGACTTGTCACTGGATTAG |
| TRAC-R2-20 | GTGACTGGAGTTCAGACGTGTGCTCTTCCGATCTACGCATAGCAGACAGACTTGTCACTGGATTAG |
| TRAC-R2-21 | GTGACTGGAGTTCAGACGTGTGCTCTTCCGATCTTCGACGGCCAGACAGACTTGTCACTGGATTAG |
| TRAC-R2-22 | GTGACTGGAGTTCAGACGTGTGCTCTTCCGATCTCTGTGGACCAGACAGACTTGTCACTGGATTAG |
| TRAC-R2-23 | GTGACTGGAGTTCAGACGTGTGCTCTTCCGATCTGGCAGATACAGACAGACTTGTCACTGGATTAG |
| TRAC-R2-24 | GTGACTGGAGTTCAGACGTGTGCTCTTCCGATCTATAGACAACAGACAGACTTGTCACTGGATTAG |

**Table S4G.** TRBC primers used in PCR2. TRBC nested primer sequences (purple) were obtained from Han et al, 2014<sup>10</sup>. An inline barcode (blue) identifies the column on the 384 well plate. One TRBC oligo is added per column of the 384 well plate. The primers are tailed with Illumina SBS12 sequence (black).

| Name       | Sequence 5' to 3'                                                 |
|------------|-------------------------------------------------------------------|
| TRBC       | GTGACTGGAGTTCAGACGTGTGCTCTCCGATCTXXXXXXXXXXCTTTGGGTGTGGGAGATCTCTG |
| TRBC-R2-1  | GTGACTGGAGTTCAGACGTGTGCTCTCCGATCTCCATTGTTCTTTGGGTGTGGGAGATCTCTG   |
| TRBC-R2-2  | GTGACTGGAGTTCAGACGTGTGCTCTCCGATCTTCCATGCTCTTTGGGTGTGGGAGATCTCTG   |
| TRBC-R2-3  | GTGACTGGAGTTCAGACGTGTGCTCTCCGATCTAGAGGAATCTTTGGGTGTGGGAGATCTCTG   |
| TRBC-R2-4  | GTGACTGGAGTTCAGACGTGTGCTCTCCGATCTACATAGCGCTTTGGGTGTGGGAGATCTCTG   |
| TRBC-R2-5  | GTGACTGGAGTTCAGACGTGTGCTCTCCGATCTCTTCCTTCCTTTGGGTGTGGGAGATCTCTG   |
| TRBC-R2-6  | GTGACTGGAGTTCAGACGTGTGCTCTCCGATCTTGGATATCCTTTGGGTGTGGGAGATCTCTG   |
| TRBC-R2-7  | GTGACTGGAGTTCAGACGTGTGCTCTCCGATCTTCTAGCGACTTTGGGTGTGGGAGATCTCTG   |
| TRBC-R2-8  | GTGACTGGAGTTCAGACGTGTGCTCTCCGATCTGAGTTACACTTTGGGTGTGGGAGATCTCTG   |
| TRBC-R2-9  | GTGACTGGAGTTCAGACGTGTGCTCTCCGATCTTCAACTGTCTTTGGGTGTGGGAGATCTCTG   |
| TRBC-R2-10 | GTGACTGGAGTTCAGACGTGTGCTCTCCGATCTTGGACCTCTTTGGGTGTGGGAGATCTCTG    |
| TRBC-R2-11 | GTGACTGGAGTTCAGACGTGTGCTCTCCGATCTGACTATTGCTTTGGGTGTGGGAGATCTCTG   |
| TRBC-R2-12 | GTGACTGGAGTTCAGACGTGTGCTCTCCGATCTATCCGCAGCTTTGGGTGTGGGAGATCTCTG   |
| TRBC-R2-13 | GTGACTGGAGTTCAGACGTGTGCTCTCCGATCTCAACGGTCCTTTGGGTGTGGGAGATCTCTG   |
| TRBC-R2-14 | GTGACTGGAGTTCAGACGTGTGCTCTCCGATCTACGGCTGCCCTTTGGGTGTGGGAGATCTCTG  |
| TRBC-R2-15 | GTGACTGGAGTTCAGACGTGTGCTCTCCGATCTTTGCAGACTTTGGGTGTGGGAGATCTCTG    |
| TRBC-R2-16 | GTGACTGGAGTTCAGACGTGTGCTCTCCGATCTCTGATTAACCTTTGGGTGTGGGAGATCTCTG  |
| TRBC-R2-17 | GTGACTGGAGTTCAGACGTGTGCTCTCCGATCTGATACAGTCTTTGGGTGTGGGAGATCTCTG   |
| TRBC-R2-18 | GTGACTGGAGTTCAGACGTGTGCTCTCCGATCTTCGCACCTCTTTGGGTGTGGGAGATCTCTG   |
| TRBC-R2-19 | GTGACTGGAGTTCAGACGTGTGCTCTCCGATCTGGTGCTGGCTTTGGGTGTGGGAGATCTCTG   |
| TRBC-R2-20 | GTGACTGGAGTTCAGACGTGTGCTCTCCGATCTCGCCACAGCTTTGGGTGTGGGAGATCTCTG   |
| TRBC-R2-21 | GTGACTGGAGTTCAGACGTGTGCTCTCCGATCTGTTAGGTCCTTTGGGTGTGGGAGATCTCTG   |
| TRBC-R2-22 | GTGACTGGAGTTCAGACGTGTGCTCTCCGATCTGTTGCGGCCCTTTGGGTGTGGGAGATCTCTG  |
| TRBC-R2-23 | GTGACTGGAGTTCAGACGTGTGCTCTCCGATCTFACTTGCACTTTGGGTGTGGGAGATCTCTG   |
| TRBC-R2-24 | GTGACTGGAGTTCAGACGTGTGCTCTCCGATCTAGATATAACTTTGGGTGTGGGAGATCTCTG   |

**Table S4H.** Housekeeping gene primers used in PCR2 (black). The forward primers are tailed with SBS3 sequence (blue). The reverse primers are tailed with SBS12 sequence (green).

| Gene        | Sequence 5' to 3'                                        |
|-------------|----------------------------------------------------------|
| ACTB-PCR2-f | ACACTCTTTCCTACACGACGCTCTCCGATCTATGACCCAGATCATGTTTGAGACC  |
| B2M-PCR2-f  | ACACTCTTTCCTACACGACGCTCTCCGATCTCTCTCTTCTGGCCTGGA         |
| PPIA-PCR2-f | ACACTCTTTCCTACACGACGCTCTCCGATCTGTCAACCCACCGTGT           |
| RPS3-PCR2-f | ACACTCTTTCCTACACGACGCTCTCCGATCTTAGGAGGGCTTGCTGTG         |
| UBB-PCR2-f  | ACACTCTTTCCTACACGACGCTCTCCGATCTCTTGCACTATAGCCATTGTC      |
| ACTB-PCR2-r | GTGACTGGAGTTCAGACGTGTGCTCTTCCGATCTAGGGATAGCACAGCCTGGAT   |
| B2M-PCR2-r  | GTGACTGGAGTTCAGACGTGTGCTCTTCCGATCTGACTTCCATTCTCTGCTGGA   |
| PPIA-PCR2-r | GTGACTGGAGTTCAGACGTGTGCTCTTCCGATCTGCAAACAGCTCAAAGGAGAC   |
| RPS3-PCR2-r | GTGACTGGAGTTCAGACGTGTGCTCTTCCGATCTCCTTTGGCCCCACTCT       |
| UBB-PCR2-r  | GTGACTGGAGTTCAGACGTGTGCTCTTCCGATCTAACATTTGAACAGGTCAGCTAT |

**Table S4I.** TCR-Row barcode oligos (P5 barcode) used in PCR3. These primers consist of Illumina sequences P5 (pink)/barcode (black)/SBS3 (blue). Oligos A -P show typical barcodes. Unique row barcodes are added to every well within one row of the 384 well plate.

| Name     | Sequence 5' to 3'                                        |
|----------|----------------------------------------------------------|
| PCR3-row | AATGATACGGCGACCACCGAGATCTCACXXXXXXXXXACACTCTTCCCTACACGAC |
| PCR3-A   | AATGATACGGCGACCACCGAGATCTCACAACCTCTTACACTCTTCCCTACACGAC  |
| PCR3-B   | AATGATACGGCGACCACCGAGATCTCACAGTCACCTACACTCTTCCCTACACGAC  |
| PCR3-C   | AATGATACGGCGACCACCGAGATCTCACCTCTAACACTCTTCCCTACACGAC     |
| PCR3-D   | AATGATACGGCGACCACCGAGATCTCACCTGAAGCTACACTCTTCCCTACACGAC  |
| PCR3-E   | AATGATACGGCGACCACCGAGATCTCACGGCAATACACTCTTCCCTACACGAC    |
| PCR3-F   | AATGATACGGCGACCACCGAGATCTCACGAACGCTAACACTCTTCCCTACACGAC  |
| PCR3-G   | AATGATACGGCGACCACCGAGATCTCACTTAGCCAGACACTCTTCCCTACACGAC  |
| PCR3-H   | AATGATACGGCGACCACCGAGATCTCACTCTCGCGCACACTCTTCCCTACACGAC  |
| PCR3-I   | AATGATACGGCGACCACCGAGATCTCACGCAGGTTGACACTCTTCCCTACACGAC  |
| PCR3-J   | AATGATACGGCGACCACCGAGATCTCACATGAATTAACACTCTTCCCTACACGAC  |
| PCR3-K   | AATGATACGGCGACCACCGAGATCTCACCGCATATTACACTCTTCCCTACACGAC  |
| PCR3-L   | AATGATACGGCGACCACCGAGATCTCACCAACTGATACACTCTTCCCTACACGAC  |
| PCR3-M   | AATGATACGGCGACCACCGAGATCTCACGTCTGCACACACTCTTCCCTACACGAC  |
| PCR3-N   | AATGATACGGCGACCACCGAGATCTCACGCTAGCAGACACTCTTCCCTACACGAC  |
| PCR3-O   | AATGATACGGCGACCACCGAGATCTCACTAATCCGGACACTCTTCCCTACACGAC  |
| PCR3-P   | AATGATACGGCGACCACCGAGATCTCACTGGTGCATACACTCTTCCCTACACGAC  |

**Table S4J.** TCR-Plate barcode oligos used in PCR3. These primers consist of Illumina sequences P7 (red)/barcode (black)/SBS12 (blue). Oligos A shows a typical barcode that can be included.

| Name       | Sequence 5' to 3'                                       |
|------------|---------------------------------------------------------|
| Plate bc   | CAAGCAGAAGACGGCATAACGAGATXXXXXXXXXGTGACTGGAGTTCAGACGTGT |
| Plate bc-A | CAAGCAGAAGACGGCATAACGAGATTTGAGCCTGTGACTGGAGTTCAGACGTGT  |

**Table S4K.** Housekeeping column primers used in PCR3. These primers consist of Illumina sequences P5 (pink)/barcode (black)/SBS3 (blue). There are 24 oligos per 384 well plate and oligos 1-24 show typical barcodes.

| Name             | Sequence 5' to 3'                                       |
|------------------|---------------------------------------------------------|
| PCR3-HK-column   | AATGATACGGCGACCACCGAGATCTCACXXXXXXXXACACTCTTCCCTACACGAC |
| PCR3-HK-column1  | AATGATACGGCGACCACCGAGATCTCACAACCTCTTACACTCTTCCCTACACGAC |
| PCR3-HK-column2  | AATGATACGGCGACCACCGAGATCTCACAGTCACCTACACTCTTCCCTACACGAC |
| PCR3-HK-column3  | AATGATACGGCGACCACCGAGATCTCACCTCTAACACACTCTTCCCTACACGAC  |
| PCR3-HK-column4  | AATGATACGGCGACCACCGAGATCTCACCTGAAGCTACACTCTTCCCTACACGAC |
| PCR3-HK-column5  | AATGATACGGCGACCACCGAGATCTCACGGCAATACACTCTTCCCTACACGAC   |
| PCR3-HK-column6  | AATGATACGGCGACCACCGAGATCTCACGAACGCTAACACTCTTCCCTACACGAC |
| PCR3-HK-column7  | AATGATACGGCGACCACCGAGATCTCACTTAGCCAGACACTCTTCCCTACACGAC |
| PCR3-HK-column8  | AATGATACGGCGACCACCGAGATCTCACTCTCGCGCACACTCTTCCCTACACGAC |
| PCR3-HK-column9  | AATGATACGGCGACCACCGAGATCTCACGCAGGTTGACACTCTTCCCTACACGAC |
| PCR3-HK-column10 | AATGATACGGCGACCACCGAGATCTCACATGAATTAACACTCTTCCCTACACGAC |
| PCR3-HK-column11 | AATGATACGGCGACCACCGAGATCTCACCGCATATTACACTCTTCCCTACACGAC |
| PCR3-HK-column12 | AATGATACGGCGACCACCGAGATCTCACCAACTGATACACTCTTCCCTACACGAC |
| PCR3-HK-column13 | AATGATACGGCGACCACCGAGATCTCACGTCTGCACACACTCTTCCCTACACGAC |
| PCR3-HK-column14 | AATGATACGGCGACCACCGAGATCTCACGCTAGCAGACACTCTTCCCTACACGAC |
| PCR3-HK-column15 | AATGATACGGCGACCACCGAGATCTCACTAATCCGGACACTCTTCCCTACACGAC |
| PCR3-HK-column16 | AATGATACGGCGACCACCGAGATCTCACTGGTGCATACACTCTTCCCTACACGAC |
| PCR3-HK-column17 | AATGATACGGCGACCACCGAGATCTCACAGAGTAGAACACTCTTCCCTACACGAC |
| PCR3-HK-column18 | AATGATACGGCGACCACCGAGATCTCACGAACTTCGACACTCTTCCCTACACGAC |
| PCR3-HK-column19 | AATGATACGGCGACCACCGAGATCTCACAGTAGGCAACACTCTTCCCTACACGAC |
| PCR3-HK-column20 | AATGATACGGCGACCACCGAGATCTCACGGAATACGACACTCTTCCCTACACGAC |
| PCR3-HK-column21 | AATGATACGGCGACCACCGAGATCTCACAGCGATTACACTCTTCCCTACACGAC  |
| PCR3-HK-column22 | AATGATACGGCGACCACCGAGATCTCACTCATGTCTACACTCTTCCCTACACGAC |
| PCR3-HK-column23 | AATGATACGGCGACCACCGAGATCTCACCGACTCTCACACTCTTCCCTACACGAC |
| PCR3-HK-column24 | AATGATACGGCGACCACCGAGATCTCACTTACAGAACACTCTTCCCTACACGAC  |

**Table S4L.** Housekeeping row primers used in PCR3. These primers consist of Illumina sequences P7 (purple)/barcode (black)/SBS12 (green).

| Name           | Sequence 5' to 3'                                                   |
|----------------|---------------------------------------------------------------------|
| PCR3-HK-row    | CAAGCAGAAGACGGCATAACGAGATXXXXXXXXXXGTGACTGGAGTTCAGACGTGTGCTCTTCCGAT |
| PCR3-HK-rowA.1 | CAAGCAGAAGACGGCATAACGAGATACTTCTTCGTGACTGGAGTTCAGACGTGTGCTCTTCCGAT   |
| PCR3-HK-rowB.1 | CAAGCAGAAGACGGCATAACGAGATTGGTAACGGTGACTGGAGTTCAGACGTGTGCTCTTCCGAT   |
| PCR3-HK-rowC.1 | CAAGCAGAAGACGGCATAACGAGATTAGATCCTGTGACTGGAGTTCAGACGTGTGCTCTTCCGAT   |
| PCR3-HK-rowD.1 | CAAGCAGAAGACGGCATAACGAGATCATCAGACGTGACTGGAGTTCAGACGTGTGCTCTTCCGAT   |
| PCR3-HK-rowE.1 | CAAGCAGAAGACGGCATAACGAGATTTACTGTCTGTGACTGGAGTTCAGACGTGTGCTCTTCCGAT  |
| PCR3-HK-rowF.1 | CAAGCAGAAGACGGCATAACGAGATGTGCGTAAAGTGACTGGAGTTCAGACGTGTGCTCTTCCGAT  |
| PCR3-HK-rowG.1 | CAAGCAGAAGACGGCATAACGAGATGGCATAGGGTGACTGGAGTTCAGACGTGTGCTCTTCCGAT   |
| PCR3-HK-rowH.1 | CAAGCAGAAGACGGCATAACGAGATCTATTCAAGTGACTGGAGTTCAGACGTGTGCTCTTCCGAT   |
| PCR3-HK-rowI.1 | CAAGCAGAAGACGGCATAACGAGATCAAGGCGAGTGACTGGAGTTCAGACGTGTGCTCTTCCGAT   |
| PCR3-HK-rowJ.1 | CAAGCAGAAGACGGCATAACGAGATCAGTTGGTGTGACTGGAGTTCAGACGTGTGCTCTTCCGAT   |
| PCR3-HK-rowK.1 | CAAGCAGAAGACGGCATAACGAGATGACGCTATGTGACTGGAGTTCAGACGTGTGCTCTTCCGAT   |
| PCR3-HK-rowL.1 | CAAGCAGAAGACGGCATAACGAGATTCTGGACCGTGACTGGAGTTCAGACGTGTGCTCTTCCGAT   |
| PCR3-HK-rowM.1 | CAAGCAGAAGACGGCATAACGAGATAAGGCGACGTGACTGGAGTTCAGACGTGTGCTCTTCCGAT   |
| PCR3-HK-rowN.1 | CAAGCAGAAGACGGCATAACGAGATTGTTATACGTGACTGGAGTTCAGACGTGTGCTCTTCCGAT   |
| PCR3-HK-rowO.1 | CAAGCAGAAGACGGCATAACGAGATCCTAGAATGTGACTGGAGTTCAGACGTGTGCTCTTCCGAT   |
| PCR3-HK-rowP.1 | CAAGCAGAAGACGGCATAACGAGATTCAGCGAAGTGACTGGAGTTCAGACGTGTGCTCTTCCGAT   |

Table S5. TCR sequences from paired TCR $\alpha\beta$  sequencing (see Excel sheet)

**Table S5A.** TCR sequences of CEF-reactive T cells (Donor 1)

**Table S5B.** TCR sequences of CEF-reactive T cells (Donor 2)

**Table S5C.** TCR sequences of non-CEF-reactive T cells (Donor 1 and 2)

**Table S5D.** TCR sequences of melanoma neoantigen pool-reactive CD4<sup>+</sup> T cells (Patient 1)

**Table S5E.** TCR sequences of melanoma neoantigen pool-reactive CD8<sup>+</sup> T cells (Patient 3)

**Table S5F.** TCR sequences of mut-*MGA*-reactive T cells









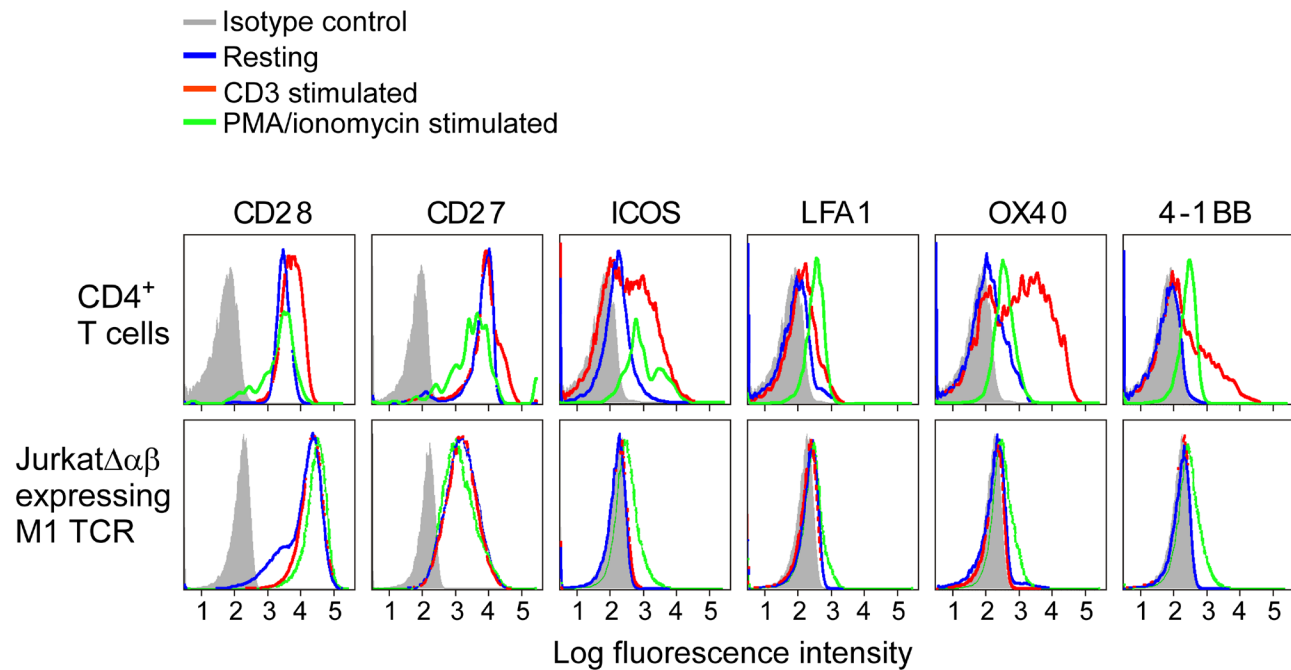

**Figure S2. Characterization of costimulation molecules expressed by the Jurkat $\Delta\alpha\beta$ .** Flow cytometry staining for costimulatory molecules on healthy donor PBMCs (gated on CD4<sup>+</sup> T cells) and Jurkat $\Delta\alpha\beta$  reporter cells expressing M1-specific TCRs (P1.7 from Donor 1) at resting state and after overnight stimulation with anti-CD3 antibody.

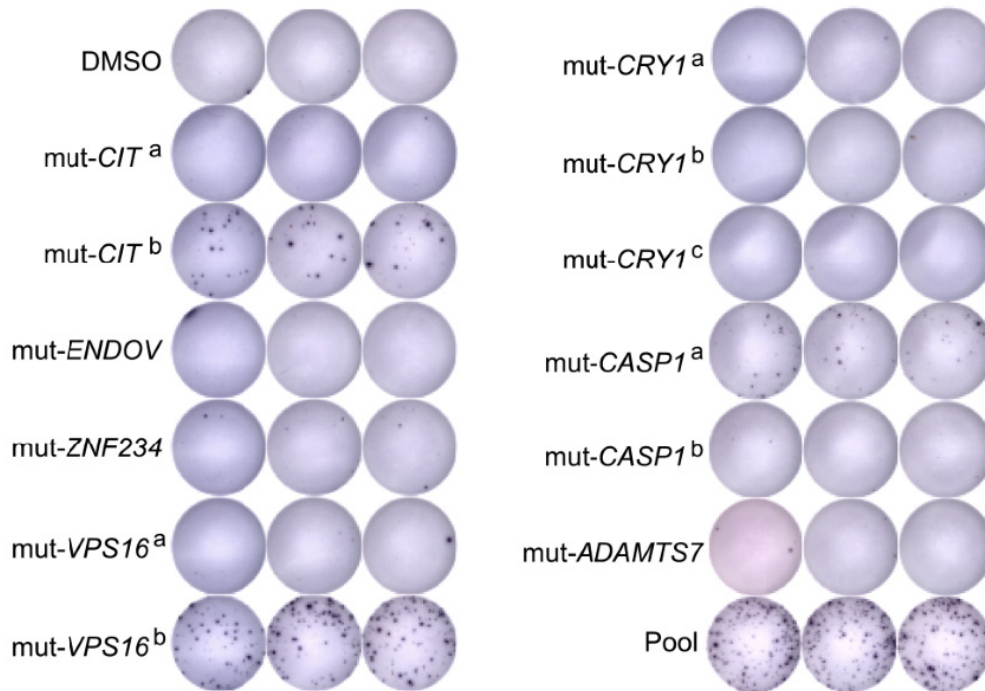

**Figure S3. Deconvolution of peptides by IFN $\gamma$  ELISPOT for melanoma Patient 3.** Patient 3 PBMC were stimulated with a pool of peptides for 21 days, followed by immunomagnetic isolation of CD8<sup>+</sup> T cells. CD8<sup>+</sup> T cells were tested by ELISPOT assay by overnight co-culture with autologous APC (CD4/CD8-depleted PBMC) and individual peptides within the pool. Three peptides (mut-*CIT*<sup>b</sup>, mut-*VPS16*<sup>b</sup> and mut-*CASP1*<sup>a</sup>) were identified to be immunogenic epitopes based on detection of IFN $\gamma$  secretion; testing against each peptide was performed in triplicate.

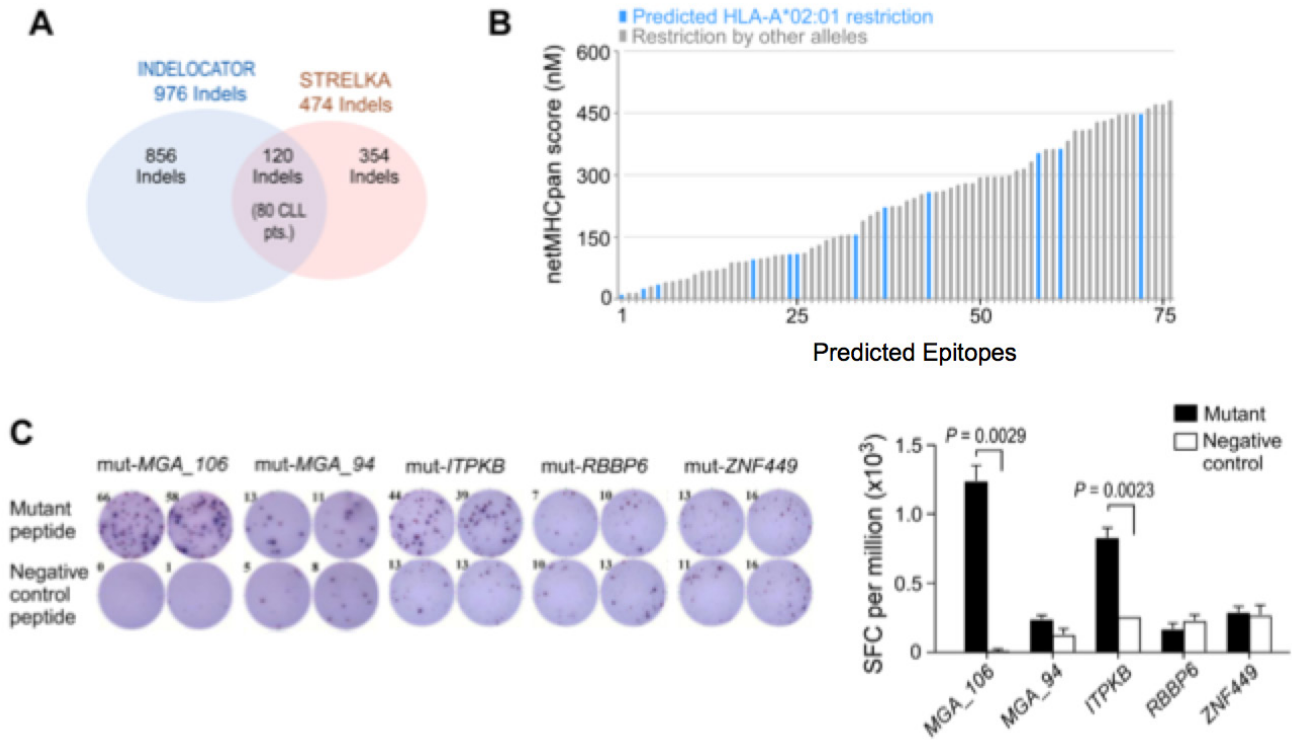

**Figure S4. Identification of immunogenic neoantigens from indel mutations in CLL.** (A) Summary of indels identified from 157 CLL patients analyzed by Indelocator and Strelka in which we focused on those events identified by the overlap intersection of results of these 2 algorithms. (B) Distribution of predicted binding affinities of the 76 neoantigens predicted to arise from 28 of the identified indels, 30 of which were strong binders (predicted  $IC_{50} < 150$  nM). (C) Two of the five predicted strong binders to HLA-A\*02:01 (mut-*MGA\_106*, mut-*ITPKB*) were identified by IFN $\gamma$  ELISPOT as immunogenic epitopes. SFC, spot forming cells.

## References

1. Britten CM, Meyer RG, Kreer T, Drexler I, Wolfel T, Herr W. The use of HLA-A\*0201-transfected K562 as standard antigen-presenting cells for CD8(+) T lymphocytes in IFN-gamma ELISPOT assays. *J Immunol Methods*. 2002;259(1-2):95-110.
2. Biernacki MA, Tai YT, Zhang GL, et al. Novel myeloma-associated antigens revealed in the context of syngeneic hematopoietic stem cell transplantation. *Blood*. 2012;119(13):3142-3150.
3. Reche PA, Keskin DB, Hussey RE, Ancuta P, Gabuzda D, Reinherz EL. Elicitation from virus-naive individuals of cytotoxic T lymphocytes directed against conserved HIV-1 epitopes. *Med Immunol*. 2006;5:1.
4. Abelin JG, Keskin DB, Sarkizova S, et al. Mass Spectrometry Profiling of HLA-Associated Peptidomes in Mono-allelic Cells Enables More Accurate Epitope Prediction. *Immunity*. 2017;46(2):315-326.
5. Bolotin DA, Poslavsky S, Mitrophanov I, et al. MiXCR: software for comprehensive adaptive immunity profiling. *Nat Methods*. 2015;12(5):380-381.
6. Altschul SF, Gish W, Miller W, Myers EW, Lipman DJ. Basic local alignment search tool. *J Mol Biol*. 1990;215(3):403-410.
7. Kobayashi E, Mizukoshi E, Kishi H, et al. A new cloning and expression system yields and validates TCRs from blood lymphocytes of patients with cancer within 10 days. *Nat Med*. 2013;19(11):1542-1546.
8. Landau DA, Carter SL, Stojanov P, et al. Evolution and impact of subclonal mutations in chronic lymphocytic leukemia. *Cell*. 2013;152(4):714-726.
9. Landau DA, Tausch E, Taylor-Weiner AN, et al. Mutations driving CLL and their evolution in progression and relapse. *Nature*. 2015;526(7574):525-530.
10. Han A, Glanville J, Hansmann L, Davis MM. Linking T-cell receptor sequence to functional phenotype at the single-cell level. *Nat Biotechnol*. 2014;32(7):684-692.
